1 **A BONCAT-iTRAQ method enables temporally resolved**  
2 **quantitative profiling of newly synthesised proteins in**  
3 ***Leishmania mexicana* parasites during starvation**

4  
5 **Karunakaran Kalesh<sup>1\*</sup>, Paul W. Denny<sup>2</sup>**

6  
7 <sup>1</sup> Department of Chemistry, Durham University, Durham, United Kingdom.

8 <sup>2</sup> Department of Biosciences, Durham University, Durham, United Kingdom.

9  
10 \* Corresponding author

11 E-mail: [kalesh.karunakaran@durham.ac.uk](mailto:kalesh.karunakaran@durham.ac.uk)

12

13

14

15

16

17

18

19

## 20 **Abstract**

21 Adaptation to starvation is integral to the *Leishmania* life cycle. The parasite can survive  
22 prolonged periods of nutrient deprivation both *in vitro* and *in vivo* and starvation plays a  
23 crucial role in the differentiation of the parasite from the non-infective promastigote form to  
24 infective metacyclics. The identification of parasite proteins synthesised during starvation is  
25 key to unravelling the molecular mechanisms facilitating adaptation to these conditions and  
26 the associated lifecycle differentiation. Additionally, as stress adaptation mechanisms in  
27 *Leishmania* are linked to virulence as well as infectivity, profiling of the complete repertoire of  
28 Newly Synthesized Proteins (NSPs) under starvation is important for drug target discovery.  
29 However, differential identification and quantitation of low abundance, starvation-specific  
30 NSPs from the larger background of the pre-existing parasite proteome has proven difficult,  
31 as this demands a highly selective and sensitive methodology. Herein we introduce an  
32 integrated chemical proteomics method in *L. mexicana* promastigotes that involves a  
33 powerful combination of the BONCAT technique and iTRAQ 4-plex quantitative proteomics  
34 Mass Spectrometry (MS), which enabled temporally resolved quantitative profiling of *de*  
35 *novo* protein synthesis in the starving parasite. Uniquely, this approach integrates the high  
36 specificity of the BONCAT technique for the NSPs, with the high sensitivity and multiplexed  
37 quantitation capability of the iTRAQ proteomics MS. Proof-of-concept experiments identified  
38 a total of 166 NSPs in the parasite and quantified the relative changes in abundance of  
39 these proteins as a function of duration of starvation. Our results show a starvation time-  
40 dependent differential expression of important translation regulators. GO analysis of the  
41 identified NSPs for Biological Process revealed translation (enrichment P value  $6.93e^{-67}$ ) and  
42 peptide biosynthetic process (enrichment P value  $1.85e^{-66}$ ) as extremely significantly  
43 enriched terms indicating the high specificity of the NSP towards regulation of protein  
44 synthesis. We believe that this approach will find wide-spread use in the study of the  
45 developmental stages of *Leishmania* species and in the broader field of protozoan biology.

46

## 47 **Author Summary**

48 Periodic nutrient scarcity plays crucial roles in the life cycle of the protozoan parasite  
49 *Leishmania spp.* Starvation triggers differentiation of the parasite from a non-infective form to  
50 an infective form. Although adaptation to nutrient stress has a pivotal role in *Leishmania*  
51 biology, the underlying mechanisms remain poorly understood. In a period of nutrient  
52 starvation, the parasite responds by decreasing its protein production to conserve nutrient  
53 resources and to prevent formation of toxic proteins. However, even during severe  
54 starvation, the parasite generates certain essential quality control and rescue proteins.  
55 Differential identification of the complete repertoire of these proteins synthesised during  
56 starvation from the pre-existing proteins in the parasite holds the key to understanding the  
57 starvation adaptation mechanisms. This has been challenging to accomplish due to technical  
58 limitations. Using a combination of chemical labelling techniques and protein mass-  
59 spectrometry, we selectively identified and measured the proteins generated in the starving  
60 *Leishmania* parasite. Our results show a starvation time-dependent differential expression of  
61 important protein synthesis regulators in the parasite. This will serve as an important dataset  
62 for a holistic understanding of the starvation adaptation mechanisms in *Leishmania*. We also  
63 believe that this method will find wide-spread applications in the field of protozoa and other  
64 parasites causing Neglected Tropical Diseases.

## 65 **Introduction**

66 Protozoan parasites of the *Leishmania spp.* are the causative agents of leishmaniasis, a  
67 Neglected Tropical Disease (NTD) endemic in over 90 countries worldwide, affecting  
68 approximately 12 million people with an estimated 700,000 to 1 million new cases annually  
69 [1]. These protozoa have a complex life cycle, progressing from extracellular promastigote  
70 stages in the sandfly vector to the obligate intramacrophage amastigote stage in the  
71 mammalian host [2]. During their digenetic life cycle *Leishmania spp.* are exposed to  
72 extreme stress conditions, including severe nutrient starvation, and the parasites have

73 evolved mechanisms to adapt to and surmount large fluctuations in nutrient availability [3-5].  
74 Nutrient starvation is also known to be critical for metacyclogenesis, a process that involves  
75 differentiation of non-infective procyclic promastigotes to the infective metacyclic  
76 promastigote stage in the sandfly vector [6,7]. However, the key proteins involved in the  
77 starvation-adaptation mechanisms of the parasite remains unknown and the identification  
78 and quantitation of proteins synthesised *de novo* during starvation is critical to develop  
79 understanding of these. Progress in this direction has been hampered by technical  
80 limitations; the lack of availability of a robust and sensitive method that can differentiate and  
81 characterise the *de novo* synthesised proteins during starvation from the complex cellular  
82 background of pre-existing proteome being the major bottleneck. Herein we describe a  
83 combination of the bio-orthogonal non-canonical amino acid tagging (BONCAT) [8,9]  
84 technology and isobaric tags for relative and absolute quantification (iTRAQ) quantitative  
85 mass-spectrometry (MS) proteomics [10,11] to quantitatively profile the newly synthesised  
86 proteome (NSP) of *Leishmania mexicana* promastigotes during starvation.

87 Regulation of eukaryotic gene expression involves a coordinated network of molecular  
88 processes starting with initiation of transcription, followed by post-transcriptional regulatory  
89 mechanisms. Processing of the primary transcript-RNAs essentially involves three steps  
90 namely capping, where a 7-methylguanosine moiety modifies the 5' end, and  
91 polyadenylation, where a poly-A tail is added at the 3' end, and finally removal of the intron  
92 sequences via splicing. The processed RNAs (mRNAs) are then transported to the  
93 cytoplasm for the translation to take place. The transcripts interact with several proteins to  
94 form messenger ribonucleoprotein complexes (mRNPs), which regulate many aspects of  
95 mRNA stability and function. Intriguingly, regulation of gene expression in *Leishmania spp.*,  
96 and other similar kinetoplastids, is fundamentally different from other eukaryotes [12-14]. As  
97 the open reading frames of genes in these parasites are arranged in long polycistronic  
98 clusters, RNA polymerase II-dependent regulation of transcription initiation does not occur  
99 and instead, monocistronic mRNAs are generated by a trans-splicing mechanism and

100 polyadenylation. The gene expression in *Leishmania spp.* is regulated almost exclusively at  
101 the post-transcriptional level and this involves protein-mediated molecular mechanisms  
102 controlling the mRNA degradation, RNA editing in the kinetoplast and protein translation.  
103 Because of the existence of an independent layer of translational regulation, the mRNA  
104 levels in *Leishmania* are not a good predictor of protein expression, and this poor correlation  
105 between the transcript and protein expressions warrants in-depth protein-level studies in this  
106 organism [15,16].

107 The proteome of an organism is highly dynamic, and the protein turnover is tightly controlled  
108 by multiple check points in protein synthesis and degradation processes. This dynamic  
109 protein turnover plays a crucial role in maintaining the cellular homeostasis. Cells respond to  
110 stimuli and perturbations by altering their protein expression levels. Measuring these  
111 changes in the proteome is important to understanding the underlying biological processes.  
112 MS proteomics serves as a powerful technique for directly measuring the effect of  
113 perturbations on cellular proteome [17]. However, during starvation in *Leishmania*, the  
114 global protein synthesis operates at a lower rate as the parasite tries to conserve available  
115 limited nutrient resources, a highly robust and sensitive enrichment method has to be  
116 coupled with the MS in order to differentially identify the NSPs from the larger background of  
117 the parasite's existing proteome.

118 We envisaged that the BONCAT technique could be applied for a selective profiling of NSPs  
119 in *L. mexicana* parasites during starvation. BONCAT involves metabolic incorporation of a  
120 methionine surrogate non-canonical amino acid bearing a small bio-orthogonal functional  
121 group, such as L-azidohomoalanine (AHA) or L-homopropargylglycine (HPG) (Fig 1A), into  
122 the newly synthesised proteins (NSPs). As AHA and/or HPG are methionine surrogates,  
123 they are readily and efficiently incorporated into NSPs by cell's endogenous translational  
124 machinery [8]. In this case, the presence of the bio-orthogonal click tag in the newly  
125 translated proteins provide an efficient means to distinguish, and selectively isolate these  
126 proteins from the pre-existing pool of proteins via a highly efficient copper (I) catalysed

127 azide-alkyne cycloaddition (CuAAC) click reaction [18] with a capture reagent bearing the  
128 orthogonal functionality to the tag (alkyne vs. azide and *vice versa*). Additionally, in order to  
129 get a temporally resolved quantitative information of the effect of starvation on the protein  
130 synthesis in the parasite, we decided to couple the BONCAT approach with iTRAQ  
131 quantitative proteomics MS [10]. The iTRAQ, similar to the tandem mass tag (TMT)  
132 quantitative proteomics [19], is a peptide-level labelling approach that offers sample  
133 multiplexing. Importantly, the multiplexed isobaric tags provide an advantage of pooling of  
134 peptide signals across the different test conditions, which increases the sensitivity of  
135 detection of even low-abundant peptides [20,21]. Using a combination of BONCAT and  
136 iTRAQ-4plex quantitative MS, we have identified and quantified a total of 166 NSPs in *L.*  
137 *mexicana* promastigotes under starvation. The iTRAQ 4-plex platform enabled profiling of  
138 relative quantitative changes in the abundance of the NSPs at three different time points  
139 after the onset of starvation in the parasite. Subsequent gene ontology (GO) analysis of the  
140 data sets revealed significant enrichment of proteins involved in regulating protein translation  
141 in the parasite. This is the first quantitative proteomics study that revealed the NSPs along  
142 with their temporally resolved quantitative expression changes during starvation in  
143 *Leishmania*.

144 **Fig 1. BONCAT in *L. mexicana* promastigotes.** (A) Chemical structure of AHA, HPG and  
145 Methionine. (B) Workflow for BONCAT in *L. mexicana* promastigotes. AHA that can be  
146 bioorthogonally tagged with a fluorescent terminal alkyne was used for the BONCAT. (C)  
147 Fluorescent labelling of the NSPs following BONCAT detected by in-gel fluorescence  
148 scanning.

## 149 **Material and methods**

### 150 **Chemicals and reagents**

151 L-Azidohomoalanine (AHA; Iris Biotech GmbH), Cycloheximide (CHX; ACROS Organics),  
152 Tris (2-carboxyethyl)phosphine hydrochloride (TCEP; Sigma Aldrich), 5-

153 Tetramethylrhodamine-Alkyne (TAMRA-Alkyne; Jena Bioscience), Acetylene-PEG4-Biotin  
154 (Biotin-Alkyne; Jena Bioscience), Tris [(1-benzyl-1H-1,2,3-triazol-4-yl)methyl]amine (TBTA;  
155 Sigma Aldrich), Dimethyl sulfoxide (DMSO; Sigma Aldrich), Copper sulphate (CuSO<sub>4</sub>; Sigma  
156 Aldrich), 2-Amino-2-(hydroxymethyl)-1,3-propanediol (Tris; Sigma Aldrich), 4-(2-  
157 Hydroxyethyl)piperazine-1-ethanesulfonic acid (HEPES; Sigma Aldrich), Sodium chloride  
158 (NaCl; Fisher Scientific), Sodium dodecyl sulphate (SDS; Fisher Scientific), Sodium  
159 bicarbonate (NaHCO<sub>3</sub>; ACROS Organics), Calcium chloride (CaCl<sub>2</sub>; Sigma Aldrich), Urea  
160 (Sigma Aldrich), 1,4-Dithiothreitol (DTT; Sigma Aldrich), 2-Chloroacetamide (CAA; Sigma  
161 Aldrich), L-Glutamine solution (Sigma Aldrich), Benzonase (Sigma Aldrich), DC™ Protein  
162 Assay (Bio-Rad), Dialysed Foetal Bovine Serum (FBS; Life Technologies), Schneider's  
163 Insect Medium (Sigma-Aldrich), Schneider's Drosophila Medium without L-Methionine (PAN  
164 Biotech), Dulbecco Phosphate Buffered Saline (DPBS, Gibco), 1M Triethylammonium  
165 bicarbonate (TEAB) buffer (Sigma Aldrich), NeutrAvidin-Agarose beads (Thermo Scientific),  
166 iTRAQ® Reagents Multiplex Kit (Sigma Aldrich), Optima™ LC-MS Grade Trifluoroacetic acid  
167 (TFA; Fisher Scientific), Optima™ LC-MS Grade Formic acid (TFA; Fisher Scientific),  
168 Optima™ LC-MS Grade Acetonitrile (CAN; Fisher Scientific), Optima™ LC-MS Grade  
169 Methanol (MeOH; Fisher Scientific) and Sequencing Grade Modified Trypsin (Promega).

## 170 **Culturing of *L. mexicana* promastigotes**

171 Promastigote form of *L. mexicana* strain M379 (MNYC/BC/62/M379) were grown in T-25  
172 flasks at 26 °C in Schneider's Insect Medium (Sigma-Aldrich) supplemented with 0.4g/L  
173 NaHCO<sub>3</sub>, 0.6g/L anhydrous CaCl<sub>2</sub> and 10% FBS (pH 7.2).

## 174 **Metabolic labelling of newly synthesised proteins in *L. mexicana*** 175 **promastigotes**

176 The promastigotes in T-25 flasks were grown to mid log phase (~5 x 10<sup>6</sup> parasites/mL) and  
177 washed with methionine-free Schneider's medium supplemented with 10% dialysed FBS.  
178 The parasites were then incubated with methionine-free Schneider's medium supplemented

179 with 10% dialysed FBS for 30 minutes to deplete the intracellular methionine reserves. The  
180 parasites were labelled with AHA (100 $\mu$ M and 1mM) in fresh methionine-free Schneider's  
181 medium supplemented with 10% dialysed FBS for 1 hour with or without CHX (10 $\mu$ M). In  
182 order to induce starvation, the parasites, after the initial 30 minutes of methionine depletion,  
183 were incubated with DPBS for different duration (1 hour to 7 hour) and treated with AHA  
184 (50 $\mu$ M) in DPBS for 1 more hour. DMSO was used as a vehicle control for the AHA  
185 treatment. In order to probe the NSPs since the point of the onset of severe starvation, in  
186 one of the samples the 1 hour AHA incubation was carried out concurrently with the first 1  
187 hour DPBS treatment. This condition is defined as the 1 hour starvation in the experiments.  
188 Following the AHA treatment, the parasites were lysed using lysis buffer (50mM HEPES, pH  
189 7.4, 150mM NaCl, 4% SDS, 250U Benzonase) and the protein concentrations were  
190 determined using Bio-Rad DC™ Protein Assay.

## 191 **Click chemistry**

192 Parasite lysates at 1mg/mL concentration were treated with freshly premixed click chemistry  
193 reaction cocktail [100 $\mu$ M capture reagent (TAMRA-Alkyne or Biotin-Alkyne; 10mM stock  
194 solution in DMSO), 1mM CuSO<sub>4</sub> solution (50mM stock solution in MilliQ water), 1mM TCEP  
195 solution (50mM stock solution in MilliQ water) and 100 $\mu$ M TBTA (10mM stock solution in  
196 DMSO)] for 3 hours at room temperature. Proteins were precipitated by adding methanol (4  
197 volumes), chloroform (1.5 volumes) and water (3 volumes) and collected by centrifugation at  
198 16,000 g for 5 minutes. The protein precipitates were washed twice with methanol (10  
199 volumes; centrifugation at 16,000 g for 5 minutes to collect the pellets) and the supernatants  
200 were discarded. The protein pellets were air-dried at room temperature for 20 minutes and  
201 stored in -80 °C freezer.

## 202 **In-gel fluorescence scanning**

203 The air-dried protein pellets were suspended in resuspension buffer (4% SDS, 50mM  
204 HEPES pH 7.4, 150mM NaCl) to 1.33mg/mL final concentration. 4X Laemmli Sample Buffer



205 (reducing) was added so that the final protein concentration was 1mg/mL. The samples were  
206 then boiled at 95 °C for 8 minutes and allowed to cool to room temperature. The proteins  
207 were resolved by SDS-PAGE (12% SDS Tris-HCl gels; 20µg of protein was loaded per gel  
208 lane). The gels were scanned for fluorescence labelling using a GE typhoon 5400 gel  
209 imager.

## 210 **Affinity enrichment**

211 The air-dried protein pellets obtained after click chemistry and protein precipitation were  
212 dissolved in phosphate buffered saline (PBS) with 2% SDS to 5mg/mL concentration by  
213 sonication. In a typical experiment, 300µg of the parasite lysate after click chemistry and  
214 protein precipitation was resuspended in 50µL of the 2% SDS buffer. The samples were the  
215 diluted 20-fold with PBS so that the final SDS amount was 0.1%. The samples were  
216 centrifuged at 10,000 g for 5 minutes to remove insoluble debris and the clear soluble  
217 portion was used for the affinity enrichment. Typically, 30µL of NeutrAvidin-Agarose beads,  
218 freshly washed three times with 0.1% SDS buffer (0.1% SDS in PBS), were added to each of  
219 the sample and the mixtures were rotated on an end-over-end rotating shaker for 2 hours at  
220 room temperature. The beads were then washed 3 times with 1% SDS in PBS, 3 times with  
221 6M urea in PBS, 3 times with PBS and once with 25mM TEAB buffer. Each washing was  
222 performed with 20 volumes of the washing solutions with respect to the bead volume and  
223 centrifugation of the beads between washing steps were carried out at 2,000 g for 1 minute  
224 at room temperature.

## 225 **On-bead reduction, alkylation and tryptic digestion**

226 The beads after affinity enrichment were resuspended in 150µl of 25mM TEAB buffer and  
227 treated with 5mM TCEP (100mM stock solution in water) for 30 minutes at 50 °C. The beads  
228 were washed once with 25mM TEAB buffer and resuspended in 150µl of 25mM TEAB buffer  
229 and treated with 10mM CAA (200mM stock solution in water) in dark for 20 minutes at room  
230 temperature. The beads were again washed with 25mM TEAB buffer and resuspended in

231 200µl of fresh 50mM TEAB buffer and treated with 5µg of sequencing grade modified trypsin  
232 at 37 °C for 16 hours. The samples were centrifuged at 5,000 g for 5 minutes at room  
233 temperature to collect the supernatant. The beads were washed twice with 50% (v/v) ACN  
234 containing 0.1% (v/v) FA (50 µL for each wash) and mixed with the previous supernatant.  
235 The collected tryptic peptides were acidified to pH 3 using FA and evaporated to dryness.  
236 The peptides were then redissolved in 0.1% (v/v) FA solution in water and subjected to  
237 desalting on Pierce™ C-18 Spin Columns (Thermo Scientific; CN: 89873) following  
238 manufacturer's instructions. The peptides were evaporated to complete dryness under a  
239 vacuum.

#### 240 **iTRAQ 4-plex labelling**

241 The iTRAQ labelling of the dried and desalted tryptic peptides were carried out using the  
242 iTRAQ® Reagents Multiplex Kit following manufacturer's instructions with minor  
243 modifications. Briefly, the peptides were resuspended in equal amounts (30µL) of dissolution  
244 buffer (0.5M TEAB buffer supplied with the iTRAQ kit). 70µL of ethanol was added to each  
245 iTRAQ 4-plex reagent vial pre-equilibrated to room-temperature. The contents of the iTRAQ  
246 reagents vials were then carefully and quickly transferred to the respective vials of peptide  
247 digests (iTRAQ® 114 to the DMSO control; iTRAQ® 115 to 1 hour starvation; iTRAQ® 116  
248 to 2 hour starvation and iTRAQ® 117 to 3 hour starvation). The labelling reactions were  
249 performed for 1.5 hours at room-temperature following which, the reactions were quenched  
250 with 100mM Tris base (1M stock solution) for 15 minutes at room-temperature. The samples  
251 labelled with the four different iTRAQ channels were then pooled into a fresh vial, and  
252 concentrated on speed-vac. The peptides were reconstituted in water with 0.1% (v/v) FA and  
253 2% (v/v) ACN and subjected to desalting on C-18 Sep-Pak Classic cartridges (Waters;  
254 WAT051910) following manufacturer's instructions. The eluted peptides were concentrated  
255 under vacuum and subjected to a second round of cleaning up on HILIC TopTip™ (PolyLC;  
256 TT200HIL) solid-phase extraction tips following manufacturer's instructions. The eluted  
257 peptides were concentrated under vacuum and reconstituted in aqueous 0.1% (v/v) FA.

## 258 **LC-MS/MS analysis**

259 The iTRAQ labelled tryptic peptides were separated on an Eksigent nanoLC 425 operating  
260 with a nano-flow module using Waters nanoEase HSS C18 T3 column (75µm x 250mm). A  
261 Waters trap column (Acquity M-Class Symmetry C18 5µm, 180µm x 20mm) was used prior  
262 to the main separating nano column. 2.5µL of sample peptides were separated by mobile  
263 phase A (0.1% formic acid in water) and mobile phase B (0.1% formic acid in ACN) at a flow  
264 rate of 300nL/minute over 110 minutes. The gradient used was the following, 5% B to 8% B  
265 (0 to 2 minutes), 8% B to 30% B (2 to 60 minutes), 30% B to 40% B (60 to 70 minutes), 40%  
266 B to 85% B (70 to 72 minutes), at 85% (72 to 78 minutes), 85% B to 5% B (78 to 80  
267 minutes), at 5% B (80 to 110 minutes). The MS analysis was performed on a TripleTOF  
268 5600 system (Sciex) in high-resolution mode. The MS acquisition time was set from gradient  
269 time 0 to 90 minutes and the MS spectra were collected in the mass range of 400 to 1600  
270 m/z with 250ms accumulation time per spectrum. Further fragmentation of each MS  
271 spectrum occurred with a maximum of 30 precursors per cycle and 33ms minimum  
272 accumulation time for each precursor across the range of 100 to 1600 m/z and dynamic  
273 exclusion for 12sec. The MS/MS spectra were acquired in high sensitivity mode and the  
274 collision energies were increased by checking the 'adjust CE when using iTRAQ reagents'  
275 box in the acquisition method.

## 276 **iTRAQ quantitative proteomics MS data processing and analysis**

277 For protein identification and quantification, the wiff files from the Sciex TripleTOF 5600  
278 system were imported into MaxQuant [22] (version 1.6.3.4) with integrated Andromeda  
279 database search engine [23]. The MS/MS spectra were queried against *L. mexicana*  
280 sequences from UniProt KB (8,524 sequences). Database search employed the following  
281 parameters: Reporter ion MS2 with multiplicity 4plex iTRAQ, trypsin digestion with maximum  
282 2 missed cleavages, oxidation of methionine and acetylation of protein N-termini as variable  
283 modifications, carbamidomethylation of cysteine as fixed modification, maximum number of

284 modifications per peptide set at 5, minimum peptide length of 6, and protein FDR 0.01.  
285 Appropriate correction factors for the individual iTRAQ channels for both peptide N-terminal  
286 labelling and lysine side-chain labelling as per the iTRAQ Reagent Multiplex Kit were also  
287 configured into the database search. The proteinGroups.txt file from the MaxQuant search  
288 output was processed using Perseus software [24] (version 1.6.2.3). Potential contaminants,  
289 reverse sequences and sequences only identified by site were filtered off. A One-sample t-  
290 test was performed on the two replicates and only proteins with  $p \leq 0.05$  were retained.  
291 Additionally, only proteins with at least 2 unique peptides identified were retained. For each  
292 identified protein, ratios of the AHA labelled Reporter Intensity Corrected vs. DMSO control  
293 sample from the corresponding replicate experiment was calculated yielding the fold change  
294 (FC). The FCs obtained for each protein were transformed into log<sub>2</sub> scale, and volcano plots  
295 were generated between the calculated significance (-Log P-value) and the obtained FC in  
296 log<sub>2</sub> scale for each protein across the three different duration of starvation.

## 297 **Gene Ontology analysis**

298 The GO terms (Molecular Function, Biological Process, and Cellular Component)  
299 significantly enriched in the NSPs relative to the predicted *L. mexicana* proteome were  
300 derived using Trypripdb.org [25]. REVIGO software [26] (revigo.irb.hr) was employed to  
301 refine and visualise the enriched GO terms.

## 302 **Results**

### 303 **AHA is metabolically incorporated into NSPs in *L. mexicana* promastigotes**

304 Although the BONCAT approach has been extensively applied in mammalian cells, reports  
305 are relatively few in lower eukaryotes. Therefore, we first decided to test if AHA is  
306 metabolically incorporated into NSPs in *L. mexicana* promastigotes. As AHA is a methionine  
307 surrogate, successful application of the BONCAT technique often requires depleting of L-  
308 methionine from the intracellular methionine reserves, and this is accomplished by  
309 maintaining the cells in a methionine-free medium for a short duration. We treated *L.*

310 *mexicana* promastigotes in methionine-free Schneider's medium with 10% dialysed FBS for  
311 30 minutes prior to incubation with AHA in the same medium for 1 hour. Treatment of protein  
312 synthesis inhibitor, cycloheximide (CHX), was used as a control. The parasite lysates were  
313 subjected to click reaction with a TAMRA-Alkyne reagent (S1 Figure) and the proteins after  
314 precipitation and re-solubilisation were resolved on SDS-PAGE and profiled via in-gel  
315 fluorescence scanning (Fig 1B). As shown in Fig 1C, intense fluorescence labelling of the  
316 NSP was observed even at the lower concentration of 100 $\mu$ M AHA treatment. Labelling  
317 saturation was observed at the higher concentration of 1mM AHA treatment. Importantly,  
318 even for the high concentration of 1mM AHA treatment, concurrent CHX treatment  
319 significantly diminished the protein labelling, indicating that the fluorescently labelled proteins  
320 are indeed newly synthesised.

### 321 **Metabolic incorporation of AHA into the NSP of *L. mexicana* promastigotes is** 322 **sensitive to starvation**

323 In order to test whether the AHA incorporation can be used for the labelling of NSPs during  
324 starvation in *L. mexicana* promastigotes, we incubated the parasites in DPBS for different  
325 time durations prior to the AHA treatment. Maintaining the parasites in DPBS without serum  
326 ensures severe starvation [27]. As shown in Fig 2, starvation-time-dependent decrease in  
327 the fluorescent labelling intensity was observed in the in-gel fluorescence scans, indicating  
328 that the AHA incorporation can be used for the labelling of the NSPs under starvation in this  
329 parasite.

330 **Fig 2. BONCAT in *L. mexicana* promastigotes under starvation.** Promastigotes were  
331 cultured in methionine-free Schneider's medium (30 minutes) prior to incubation in DPBS for  
332 different time periods (1 hour to 7 hours). The starved parasites were treated with AHA  
333 (50 $\mu$ M; lanes 3 to 9) or DMSO (control; lane 2) with (lane 9) or without CHX (10 $\mu$ M) for the  
334 last 1 hour of starvation and the NSPs were profiled by in-gel fluorescence scanning

335 following click chemistry with a TAMRA-Alkyne. A Coomassie blue staining of the same gel  
336 that demonstrates even loading across the gel lanes is shown on the right panel.

337 **Development of a BONCAT-iTRAQ 4-plex workflow for quantitative proteomics**  
338 **MS profiling of the NSP during starvation in *L. mexicana* promastigotes**

339 The in-gel fluorescence scanning only provides a qualitative information of the differential  
340 AHA labelling under starvation. In order to identify and generate a comparative quantitation  
341 of the NSPs at different time-points of starvation, we coupled the iTRAQ quantitative  
342 proteomics MS with the BONCAT. We used iTRAQ 4-plex labelling that enables comparison  
343 of 4 different experimental conditions in one experiment. As starvation beyond 3 hour  
344 duration was found to generate very little protein labelling in this parasite (Fig 2), we decided  
345 to compare the 1 hour, 2 hour and 3 hour time periods of starvation using quantitative  
346 proteomics. As shown in Fig 3, *L. mexicana* promastigotes, following the three different  
347 durations of incubation with DPBS, were treated with AHA to label the NSP. DMSO  
348 treatment instead of AHA was used as a control. The parasite lysates were subjected to click  
349 chemistry with a Biotin-Alkyne capture reagent (S1 Figure) and the labelled proteome were  
350 affinity enriched on NeutrAvidin-Agarose beads. The strong non-covalent interaction  
351 between biotin in the capture reagent and NeutrAvidin ( $K_d \approx 10^{-15}M$ ) [28] permits stringent  
352 washing steps during the affinity enrichment protocol, enabling highly robust and selective  
353 pull-down of the labelled NSPs. After on-bead reduction, alkylation and tryptic digestion, the  
354 peptide digests were subjected to labelling with iTRAQ 4-plex reagents. The samples were  
355 then combined, desalted and analysed by nanoLC-MS/MS.

356 **Fig 3. Schematic representation of the integrated BONCAT-iTRAQ 4-plex workflow**  
357 **used for profiling of NSPs of starving *L. mexicana* promastigotes.** The NSPs in the  
358 parasites starved to 1 hour, 2 hour and 3 hour duration were tagged with AHA, following  
359 which the parasites were lysed, and the proteins were labelled using click reaction with  
360 Biotin-Alkyne. The labelled proteins were affinity enriched on NeutrAvidin beads, and

361 following on-bead tryptic digestion, the released peptides were subjected to iTRAQ labelling.  
362 iTRAQ channel 114 was used for labelling the DMSO control sample, whilst channels 115,  
363 116 and 117 were used respectively for labelling the NSPs at 1 hour, 2 hour and 3 hour  
364 starvation. The samples after pooling together were analysed by nanoLC-MS/MS.

### 365 **Identification and time-resolved quantitation of NSP in *L. mexicana*** 366 **promastigotes during starvation**

367 As shown in S1 Table, over 300 proteins were identified across the two replicate BONCAT-  
368 iTRAQ 4-plex experiments, of which 166 protein quantifications were statistically significant  
369 in a t-test analysis. For each of these NSPs, the iTRAQ reporter intensity ratio at each tested  
370 starvation duration to the DMSO control iTRAQ reporter intensity (iTRAQ 114 channel)  
371 within the same experiment was calculated. The observed fold change (FC) in abundance of  
372 each protein, after converting to log<sub>2</sub> scale, was plotted against the significance in the t-test  
373 (-Log P-value). This enables filtering of the NSPs most significantly influenced by each  
374 tested duration of starvation (highlighted in blue in Fig 4A). A global decrease in the *de novo*  
375 protein synthesis was observed with increase in the duration of starvation. Functional  
376 annotation of the top-50 proteins by eggNOG database [29] revealed Translation, ribosomal  
377 structure and biogenesis and Posttranslational modification, protein turnover and chaperons  
378 along with Protein function unknown as the most abundant classifications (Fig 4B). The top-  
379 15 proteins with the highest changes in their abundance at each of the three tested duration  
380 of starvation are listed in the Table 1 (S2 Table, S3 Table and S4 Table report the top-50  
381 NSPs identified at 1 hour, 2 hour and 3 hour starvation respectively). As shown in Table 1,  
382 many translation regulating proteins were observed among the top-ranking proteins at all  
383 three tested durations of starvation. Importantly, whilst the elongation initiation factor 2 alpha  
384 subunit, putative (Gene ID: LmxM.03.0980) and eukaryotic translation initiation factor 5A  
385 (Gene ID: LmxM.25.0720) were observed among the top-ranking proteins at the initial and  
386 intermediate stages of starvation (1 hour and 2 hours of starvation respectively), their  
387 relative abundance ranking among the NSPs went down at the later stage of starvation (3



388 hours duration). Thus, our data shows that at different durations of starvation in the parasite,  
 389 a panel of important translation regulator proteins are expressed to different abundance  
 390 levels.

391 **Fig 4. iTRAQ 4-plex quantitative proteomics MS profiling of NSPs of *L. mexicana***  
 392 **promastigotes during starvation. (A)** Volcano plots of the NSP detected at the three  
 393 durations of starvation. The significance of the iTRAQ reporter intensities obtained for each  
 394 NSP at each tested duration of starvation across two replicates as -Log P-values was plotted  
 395 against the observed fold change (FC) in abundance in log2 scale. Proteins with a log2 FC  
 396 of more than 1 with significant iTRAQ quantifications are highlighted in blue. **(B)** Functional  
 397 annotation pie chart of the top-50 NSPs. The letter codes used for the functional categories  
 398 are the following. (T) Translation, ribosomal structure and biogenesis; (F) Function unknown;  
 399 (P) Post-translational modification, protein turnover, and chaperones; (A) Amino acid  
 400 transport and metabolism; (C1) Carbohydrate transport and metabolism; (C2) Coenzyme  
 401 transport and metabolism; (C3) Chromatin structure and dynamics; (C4) Cytoskeleton; (C5)  
 402 Cell wall/membrane/envelope biogenesis; (R) Replication, recombination and repair; (R2)  
 403 RNA processing and modification; (N) Nucleotide transport and metabolism; (T2)  
 404 Transcription; (E) Energy production and conversion.

405 **Table 1. Top-15 NSPs identified in *L. mexicana* promastigotes upon starvation**

| Top 15 NSPs at 1 hour starvation                       |                      |                         |                   |                |                     |                                                 |
|--------------------------------------------------------|----------------------|-------------------------|-------------------|----------------|---------------------|-------------------------------------------------|
| Protein name                                           | Gene ID <sup>a</sup> | Protein ID <sup>b</sup> | Mol. weight [kDa] | -Log (P-value) | Log <sub>2</sub> FC | Functional annotation <sup>c</sup>              |
| Kinetoplastid membrane protein-11                      | LmxM.34.2221         | E9B6A2                  | 11.22             | 1.747435       | 4.756552            | Function unknown                                |
| Elongation initiation factor 2 alpha subunit, putative | LmxM.03.0980         | E9AJY23                 | 46.623            | 2.219643       | 4.395249            | Translation, ribosomal structure and biogenesis |
| Glyceraldehyde-3-phosphate dehydrogenase               | LmxM.29.2980         | E9B170                  | 39.123            | 2.547562       | 3.877277            | Carbohydrate transport and metabolism           |



|                                                                                          |                 |        |        |          |          |                                                                   |
|------------------------------------------------------------------------------------------|-----------------|--------|--------|----------|----------|-------------------------------------------------------------------|
| Eukaryotic translation initiation factor 5A                                              | LmxM.25.0720    | E9AXF0 | 17.828 | 3.813115 | 3.834992 | Translation, ribosomal structure and biogenesis                   |
| GDP-mannose pyrophosphorylase                                                            | LmxM.23.0110    | E9AW11 | 41.49  | 1.55459  | 3.787338 | Cell wall/membrane/envelope biogenesis                            |
| Putative 60S ribosomal protein L22                                                       | LmxM.36.3270    | E9ATA6 | 15.074 | 3.863737 | 3.76711  | Translation, ribosomal structure and biogenesis                   |
| Putative 60S acidic ribosomal protein P2                                                 | LmxM.29.3730    | E9B1E7 | 10.627 | 2.262506 | 3.74683  | Translation, ribosomal structure and biogenesis                   |
| Tubulin beta chain                                                                       | LmxM.32.0792    | E9AMJ9 | 49.723 | 3.188093 | 3.594419 | Cytoskeleton                                                      |
| Tryparedoxin peroxidase                                                                  | LmxM.15.1160    | E9AQA6 | 22.21  | 2.248598 | 3.523576 | Post-translational modification, protein turnover, and chaperones |
| Putative orotidine-5-phosphate decarboxylase/orotate phosphoribosyltransferase, putative | LmxM.16.0550    | E9AQL3 | 49.674 | 1.355092 | 3.517329 | Nucleotide transport and metabolism                               |
| RNA-binding protein, putative, UPB2                                                      | LmxM.25.0500    | E9AXC7 | 19.012 | 2.688037 | 3.455806 | Function unknown                                                  |
| 60S ribosomal protein L6                                                                 | LmxM.15.1000    | E9AQ99 | 21.037 | 1.36506  | 3.454972 | Translation, ribosomal structure and biogenesis                   |
| Ubiquitin-fusion protein                                                                 | LmxM.30.1900    | E9B1Y9 | 8.865  | 2.410696 | 3.381503 | Translation, ribosomal structure and biogenesis                   |
| Histone H2A                                                                              | LmxM.08_29.1740 | E9ALP9 | 13.969 | 3.177759 | 3.312446 | Chromatin structure and dynamics                                  |
| Transaldolase                                                                            | LmxM.16.0760    | E9AQN5 | 36.976 | 1.985447 | 3.230702 | Carbohydrate transport and metabolism                             |
| <b>Top 15 NSPs at 2 hour starvation</b>                                                  |                 |        |        |          |          |                                                                   |
| Elongation initiation factor 2 alpha subunit, putative                                   | LmxM.03.0980    | E9AJY2 | 46.623 | 3.316291 | 3.953726 | Translation, ribosomal structure and biogenesis                   |
| Kinetoplastid membrane protein-11                                                        | LmxM.34.2221    | E9B6A2 | 11.22  | 2.046619 | 3.629923 | Function unknown                                                  |
| Tubulin beta chain                                                                       | LmxM.32.0792    | E9AMJ9 | 49.723 | 3.686411 | 3.526887 | Cytoskeleton                                                      |
| RNA-binding protein, putative                                                            | LmxM.25.0500    | E9AXC7 | 19.012 | 2.51055  | 3.383927 | Function unknown                                                  |
| Glyceraldehyde-3-phosphate dehydrogenase                                                 | LmxM.29.2980    | E9B170 | 39.123 | 2.269162 | 3.350621 | Carbohydrate transport and metabolism                             |
| Biotin/lipoate protein ligase-like protein                                               | LmxM.30.1070    | E9B1Q4 | 28.493 | 1.707647 | 3.319175 | Coenzyme transport and metabolism                                 |
| Tryparedoxin peroxidase                                                                  | LmxM.15.1160    | E9AQA6 | 22.21  | 2.19709  | 3.283704 | Post-translational modification, protein                          |

|                                                    |                     |            |             |              |              |                                                 |
|----------------------------------------------------|---------------------|------------|-------------|--------------|--------------|-------------------------------------------------|
|                                                    |                     |            |             |              |              | turnover, and chaperones                        |
| 60S ribosomal protein L6                           | LmxM.15.1000        | E9AQ9<br>9 | 21.03<br>7  | 1.2989<br>93 | 3.1990<br>77 | Translation, ribosomal structure and biogenesis |
| Putative 60S ribosomal protein L22                 | LmxM.36.3270        | E9ATA<br>6 | 15.07<br>4  | 1.6477<br>16 | 3.1330<br>6  | Translation, ribosomal structure and biogenesis |
| Eukaryotic translation initiation factor 5A        | LmxM.25.0720        | E9AXF<br>0 | 17.82<br>8  | 2.2950<br>76 | 3.0681<br>84 | Translation, ribosomal structure and biogenesis |
| Putative ATP-dependent RNA helicase                | LmxM.34.3100        | E9B6I9     | 100.8<br>8  | 2.3990<br>55 | 3.0520<br>7  | Replication, recombination and repair           |
| Activated protein kinase c receptor (LACK)         | LmxM.28.2740        | E8NHN<br>2 | 34.40<br>2  | 1.3113<br>91 | 3.0307<br>48 | Function unknown                                |
| Uncharacterized protein                            | LmxM.13.0450        | E9AP6<br>9 | 13.32<br>3  | 2.0627<br>74 | 2.9721<br>7  | Function unknown                                |
| Putative 60S ribosomal protein L17                 | LmxM.24.0040        | E9AWJ<br>4 | 19.08<br>3  | 1.8964<br>8  | 2.9589<br>66 | Translation, ribosomal structure and biogenesis |
| IgE-dependent histamine-releasing factor, putative | LmxM.24.1500        | E9AWZ<br>6 | 19.31<br>7  | 1.4227<br>18 | 2.9589<br>53 | Function unknown                                |
| <b>Top 15 NSPs at 3 hour starvation</b>            |                     |            |             |              |              |                                                 |
| Putative 60S ribosomal protein L22                 | LmxM.36.3270        | E9ATA<br>6 | 15.07<br>4  | 2.2203<br>19 | 2.9090<br>78 | Translation, ribosomal structure and biogenesis |
| Putative 60S ribosomal protein L35                 | LmxM.26.2330        | E9AYL<br>4 | 15.19<br>1  | 1.6257<br>69 | 2.1479<br>44 | Translation, ribosomal structure and biogenesis |
| Uncharacterized protein                            | LmxM.23.0080        | E9AW<br>08 | 48.44<br>4  | 0.9621<br>09 | 2.0315<br>83 | Function unknown                                |
| I/6 autoantigen-like protein                       | LmxM.22.1460        | E9AVX<br>8 | 22.87<br>9  | 0.5898<br>46 | 2.0045<br>34 | Function unknown                                |
| Histone H2A                                        | LmxM.08_29.1<br>740 | E9ALP<br>9 | 13.96<br>67 | 3.4480<br>74 | 1.9059<br>74 | Chromatin structure and dynamics                |
| Putative 60S ribosomal protein L17                 | LmxM.24.0040        | E9AWJ<br>4 | 19.08<br>3  | 1.7991<br>47 | 1.8606<br>91 | Translation, ribosomal structure and biogenesis |
| Kinetoplastid membrane protein-11                  | LmxM.34.2221        | E9B6A<br>2 | 11.22<br>31 | 1.1117<br>93 | 1.8566<br>93 | Function unknown                                |
| RNA-binding protein, putative                      | LmxM.25.0500        | E9AXC<br>7 | 19.01<br>2  | 2.1265<br>5  | 1.7272<br>87 | Function unknown                                |
| Activated protein kinase c receptor (LACK)         | LmxM.28.2740        | E8NHN<br>2 | 34.40<br>2  | 1.6053<br>77 | 1.6777<br>28 | Function unknown                                |
| Uncharacterized protein                            | LmxM.13.0450        | E9AP6<br>9 | 13.32<br>3  | 1.7116<br>89 | 1.6698<br>06 | Function unknown                                |
| Aconitate hydratase                                | LmxM.18.0510        | E9ARI8     | 97.47       | 1.2120<br>84 | 1.6059<br>34 | Energy production and conversion                |
| Glyceraldehyde-3-phosphate dehydrogenase           | LmxM.29.2980        | E9B17<br>0 | 39.12<br>3  | 1.2617<br>43 | 1.4515<br>95 | Carbohydrate transport and metabolism           |

|                                       |              |        |            |              |              |                                                                   |
|---------------------------------------|--------------|--------|------------|--------------|--------------|-------------------------------------------------------------------|
| Putative 40S ribosomal protein S18    | LmxM.36.0930 | E9ASL3 | 17.36<br>8 | 3.5562<br>83 | 1.4075<br>94 | Translation, ribosomal structure and biogenesis                   |
| Putative 40S ribosomal protein S17    | LmxM.28.2555 | E9B07  | 16.40<br>8 | 2.9067<br>02 | 1.3972<br>14 | Translation, ribosomal structure and biogenesis                   |
| Peroxidoxin (Tryparedoxin peroxidase) | LmxM.23.0040 | E9AW04 | 25.37<br>3 | 1.5036<br>24 | 1.3826<br>14 | Post-translational modification, protein turnover, and chaperones |

406 The Top-15 proteins that were identified and differentially expressed during 1 hour, 2 hours and 3  
407 hours starvation in two replicates with significant T-Test values ( $P \leq 0.05$ ) are presented.

408 <sup>a</sup>Gene ID according to the GeneDB: The Sanger Institute Pathogen Genomics Database

409 ([www.genedb.org](http://www.genedb.org)).

410 <sup>b</sup>Protein ID according to the Universal Protein Resource (UniProt) ([www.uniprot.org](http://www.uniprot.org)).

411 <sup>c</sup>Functional classification determined by eggNOG database.

412

### 413 **Gene Ontology (GO) analysis of the NSPs in *L. mexicana* promastigotes during** 414 **starvation**

415 Biological Process GO term enrichment analysis (Fig 5A) of the complete 166 statistically  
416 significant protein IDs of the NSPs revealed translation ( $P$  value  $7.82e^{-68}$ ; 86 entries) and  
417 peptide biosynthetic process ( $P$  value  $2.01e^{-67}$ ; 86 entries) as the most significantly enriched  
418 terms. Gene expression ( $P$  value  $1.04e^{-50}$ ; 91 entries) was also among highly enriched  
419 terms. Ribosome ( $P$  value  $4.47e^{-68}$ ; 76 entries) and ribonucleoprotein complex ( $P$  value  
420  $6.66e^{-61}$ ; 76 entries) were the most significantly enriched Cellular Component GO terms (Fig  
421 5B). Similarly, Molecular Function GO term analysis (Fig 5C) revealed structural constituent  
422 of ribosome ( $P$  value  $1.22e^{-68}$ ; 76 entries), structural molecular activity ( $P$  value  $2.11e^{-65}$ ; 76  
423 entries), RNA binding ( $P$  value  $3.66e^{-10}$ ; 28 entries) and unfolded protein binding ( $P$  value  
424  $5.22e^{-9}$ ; 12 entries) as the most significantly enriched terms. The GO analyses clearly  
425 indicate the high specificity of the identified NSP towards regulation of protein synthesis in  
426 the ribosome relative to the available data of whole cell proteome of the parasite  
427 ([Tritypdb.org](http://Tritypdb.org)).

428 **Fig 5. Gene Ontology Term enrichment of the 166 NSPs relative to the predicted *L.***  
429 ***mexicana* whole proteome. (A) GO term enrichment for Biological Process (B) GO term**

430 enrichment for Cellular Component, and (C) GO term enrichment for Molecular Function.

431 The GO terms were refined and visualised using REVIGO software.

## 432 **Discussion**

433 Quantitative proteomics profiling of NSPs during severe starvation in the *Leishmania*  
434 parasites require a methodology that is robust and sensitive to distinguish the lower-  
435 abundance NSPs from the pre-existing pool of the parasite proteome. We reasoned that a  
436 workflow that combines the BONCAT technique with a peptide-level labelling-based  
437 quantitative proteomics MS technique such as iTRAQ or TMT labelling could be developed  
438 to meet this requirement. The high efficiency and bio-orthogonality of the click reaction could  
439 ensure robust and preferential enrichment of the NSPs. Besides, AHA treatment has been  
440 proven to be non-toxic as it does not cause significant protein misfolding or alterations in the  
441 global protein turn over [8,30]. Similarly, the iTRAQ quantitative proteomics MS offers a  
442 powerful technology for comparative proteomics. It enables highly sensitive and reliable  
443 quantitation of protein abundance changes across multiple experimental conditions. iTRAQ,  
444 and other similar labelling-based quantitative MS techniques offer far more reliable and  
445 reproducible proteome quantitation than the different versions of spectral counting or  
446 precursor ion signal intensity-based label-free quantitative MS [31,32]. The sample  
447 multiplexing of iTRAQ method provides an additional benefit of peptide signal pooling effect,  
448 which increases the sensitivity of detection; a particularly useful feature in the starvation  
449 experiment, a context where the global protein synthesis is significantly lowered. Thus, the  
450 unique combination of BONCAT approach and iTRAQ quantitative proteomics MS provided  
451 a workflow that is robust and sensitive to profiling the NSPs of *L. mexicana* promastigotes  
452 under severe starvation.

453 Although the alternative, ribosome profiling [33,34] is emerging as a powerful method for  
454 global profiling of protein translation, MS-based proteomics, comparatively, provides a more  
455 direct, and therefore more reliable, readout of the cellular proteome and its changes under

456 different perturbations [35]. Proteins are more robust during sample handling, whilst every  
457 step in the experimental protocols of ribosome profiling from cell lysis to nuclease digestion  
458 to library generation is likely to cause distortions in the data [36]. The use of translational  
459 inhibitors during ribosome profiling is also known to affect the local distribution of ribosomes  
460 on mRNAs [37]. Additionally, false readout of translation due to contaminating ribosomal  
461 RNA (rRNA) fragments is a common occurrence in ribosome profiling [38]. In a starvation  
462 condition, when the global translation levels are low, the rRNA contaminating fragments  
463 could significantly compromise the ribosome footprint sequencing space [33]. Our BONCAT-  
464 iTRAQ MS approach in *Leishmania* provides a powerful alternative to the ribosome profiling  
465 in the protozoa, and the method in *L. mexicana* promastigotes enabled direct profiling of the  
466 NSPs and their relative quantitative changes in abundance under starvation in a time-  
467 dependent manner.

468 In higher eukaryotes, the eukaryotic initiation factor 2 alpha (eIF2 $\alpha$ ) serves as an essential  
469 component for protein synthesis. It also acts as a key translation regulator during stress  
470 conditions including nutrient starvation [39]. The eIF2 $\alpha$ -mediated translational regulation has  
471 been reported to facilitate differentiation in *Leishmania* parasites [40]. The observation of the  
472 elongation initiation factor 2 alpha subunit, putative (Gene ID: LmxM.03.0980) along with  
473 several other translation-facilitating proteins among the top-ranking proteins in the early and  
474 intermediate stages of starvation in *L. mexicana* promastigotes compared to the observed  
475 lower ranking of these proteins in the later stage of starvation indicates a starvation time-  
476 dependent differential regulation of protein synthesis in the parasite. Some of the top-ranking  
477 proteins identified in this study are known to be important from a disease-tackling point of  
478 view. For instance, the kinetoplast membrane protein-11, a protein that is conserved in all  
479 kinetoplastids, has been characterised as a virulence factor in *L. amazonensis* infection and  
480 is investigated as a vaccine candidate [41]. Importantly, the expression of this protein has  
481 been previously reported to be upregulated during metacyclogenesis [42]. Another important  
482 protein, activated protein kinase c receptor (LACK), has been reported to act as a T-cell

483 epitope, and was proposed as yet another potential candidate for vaccine development [43].  
484 Another top-ranking protein, tryparedoxin peroxidase, is an important enzyme the parasite  
485 relies on for detoxifying reactive oxygen species [44]. This protein has been found to be  
486 upregulated in amphotericin B-resistant isolates [45] and antimony-resistant isolates of  
487 *Leishmania supp.* [46], indicating its possible role in drug resistance. Yet another top-ranking  
488 protein glyceraldehyde-3-phosphate dehydrogenase has been reported to be required for  
489 survival of *L. donovani* in visceral organs [47].

490 Our results indicate that Translation, ribosome structure and biogenesis and  
491 Posttranslational modifications, protein turnover and chaperons were among the most  
492 representative enriched functional annotations of the NSPs identified. This is in congruence  
493 with the previous finding that *Leishmania* exerts an increased level of control on translation  
494 during stress conditions [40]. A higher level control on translation is expected under  
495 starvation as translation is energetically a costly process for the cell [48], and therefore the  
496 parasite has to rely on an increased level of control on translation, and potentially  
497 posttranslational mechanisms as well, for conserving the available limited nutrient resources,  
498 and to optimise and appropriately regulate protein synthesis to avoid generating toxic protein  
499 forms. This is the first study that comprehensively and quantitatively profiled the NSPs  
500 during starvation in *Leishmania*. It is, however, important to note that despite the recent  
501 advancements in the genome sequencing of several *Leishmania* strains, a major portion of  
502 the predicted parasite proteome remain functionally unannotated and termed  
503 uncharacterised. Nevertheless, bioinformatics methods such as protein-protein interaction  
504 mapping [49], domain identification [50] and structural homology modelling [51] are making  
505 advancements in the protein functional annotation efforts. Therefore, we believe that along  
506 with future developments in more detailed functional characterisation of the *Leishmania*  
507 proteome, our results will provide additional insights into the molecular mechanisms involved  
508 in regulating the gene expression under severe starvation in the protozoan. Regulation of  
509 protein synthesis in kinetoplastids is currently poorly understood. Our method introduces a

510 powerful platform for studying the protein synthesis in the parasites in a temporally resolved,  
511 quantitative and high-throughput manner. It is anticipated that our methodology will find  
512 wide-spread applications in the kinetoplastida parasites and in the broader area of NTD, and  
513 the results from this study will serve as a starting point for future studies to unravel the  
514 starvation-adaptation mechanisms in different life cycle stages in these parasites.

## 515 **Acknowledgements**

516 We acknowledge stimulating discussions with Professor Patrick G. Steel, Department of  
517 Chemistry, Durham University, UK and Associate Professor Steven Cobb, Department of  
518 Chemistry, Durham University, UK. Special thanks to Dr Adrian Brown, Proteomics Facility,  
519 Department of Biosciences, Durham University, UK for technical support on HILIC solid-phase  
520 extraction and for the nanoLC-MS/MS runs.

## 521 **Author Contributions**

522 Conceived of the study and designed experiments: KK. Performed experiments: KK.  
523 Oversaw project management: PWD, KK. Analysed the data: KK. Contributed reagents and  
524 materials: PWD, KK. Wrote the paper: KK. Reviewed the paper: PWD.

## 525 **References**

- 526 1. Alvar J, Velez ID, Bern C, Herrero M, Desjeux P, Cano J, et al. Leishmaniasis worldwide and  
527 global estimates of its incidence. PLoS One. 2012;7(5):e35671. PMID: 22693548.
- 528 2. De Pablos LM, Ferreira TR, Walrad PB. Developmental differentiation in Leishmania lifecycle  
529 progression: post-transcriptional control conducts the orchestra. Curr Opin Microbiol.  
530 2016;34:82-9. PMID: 27565628.
- 531 3. Carter NS, Yates PA, Gessford SK, Galagan SR, Landfear SM, Ullman B. Adaptive  
532 responses to purine starvation in Leishmania donovani. Mol Microbiol. 2010;78(1):92-107.  
533 PMID: 20923417.
- 534 4. Spath GF, Drini S, Rachidi N. A touch of Zen: post-translational regulation of the Leishmania  
535 stress response. Cell Microbiol. 2015;17(5):632-8. PMID: 25801803.



- 536       **5.** Martin JL, Yates PA, Soysa R, Alfaro JF, Yang F, Burnum-Johnson KE, et al. Metabolic  
537       reprogramming during purine stress in the protozoan pathogen *Leishmania donovani*. *PLoS*  
538       *Pathog.* 2014;10(2):e1003938. PMID: 24586154.
- 539       **6.** Serafim TD, Figueiredo AB, Costa PAC, Marques-Da-Silva EA, Goncalves R, de Moura SAL,  
540       et al. *Leishmania* Metacyclogenesis Is Promoted in the Absence of Purines. *PLoS Negl Trop*  
541       *Dis.* 2012;6(9):e1833. PMID: 23050028.
- 542       **7.** Louradour I, Monteiro CC, Inbar E, Ghosh K, Merkhofer R, Lawyer P, et al. The midgut  
543       microbiota plays an essential role in sand fly vector competence for *Leishmania major*. *Cell*  
544       *Microbiol.* 2017;19(10):e12755. PMID: 28580630.
- 545       **8.** Dieterich DC, Link AJ, Graumann J, Tirrell DA, Schuman EM. Selective identification of newly  
546       synthesized proteins in mammalian cells using bioorthogonal noncanonical amino acid  
547       tagging (BONCAT). *Proc Natl Acad Sci U S A.* 2006;103(25):9482-7. PMID: 16769897.
- 548       **9.** Dieterich DC, Lee JJ, Link AJ, Graumann J, Tirrell DA, Schuman EM. Labeling, detection and  
549       identification of newly synthesized proteomes with bioorthogonal non-canonical amino-acid  
550       tagging. *Nat Protoc.* 2007;2(3):532-40. PMID: 17406607.
- 551       **10.** Ross PL, Huang YLN, Marchese JN, Williamson B, Parker K, Hattan S, et al. Multiplexed  
552       protein quantitation in *Saccharomyces cerevisiae* using amine-reactive isobaric tagging  
553       reagents. *Mol Cell Proteomics.* 2004;3(12):1154-69. PMID: 15385600.
- 554       **11.** Wiese S, Reidegeld KA, Meyer HE, Warscheid B. Protein labeling by iTRAQ: A new tool for  
555       quantitative mass spectrometry in proteome research. *Proteomics.* 2007;7(3):340-50. PMID:  
556       17177251.
- 557       **12.** Clayton C, Shapira M. Post-transcriptional regulation of gene expression in trypanosomes  
558       and leishmanias. *Mol Biochem Parasitol.* 2007;156(2):93-101. PMID: 17765983.
- 559       **13.** Haile S, Papadopoulou B. Developmental regulation of gene expression in trypanosomatid  
560       parasitic protozoa. *Curr Opin Microbiol.* 2007;10(6):569-77. PMID: 18177626.
- 561       **14.** Kramer S. Developmental regulation of gene expression in the absence of transcriptional  
562       control: The case of kinetoplastids. *Mol Biochem Parasitol.* 2012;181(2):61-72. PMID:  
563       22019385.



- 564 **15.** Lahav T, Sivam D, Volpin H, Ronen M, Tsigankov P, Green A, et al. Multiple levels of gene  
565 regulation mediate differentiation of the intracellular pathogen *Leishmania*. *FASEB J*.  
566 2011;25(2):515-25. PMID: 20952481.
- 567 **16.** de Pablos LM, Ferreira TR, Dowle AA, Forrester S, Parry E, Newling K, et al. The mRNA-  
568 bound Proteome of *Leishmania mexicana*: Novel Genetic Insight into an Ancient Parasite. *Mol*  
569 *Cell Proteomics*. 2019;18(7):1271-84. PMID: 30948621.
- 570 **17.** Walther TC, Mann M. Mass spectrometry-based proteomics in cell biology. *J Cell Biol*.  
571 2010;190(4):491-500. PMID: 20733050.
- 572 **18.** Presolski SI, Hong VP, Finn MG. Copper-Catalyzed Azide-Alkyne Click Chemistry for  
573 Bioconjugation. *Curr Protoc Chem Biol*. 2011;3(4):153-62. PMID: 22844652.
- 574 **19.** Thompson A, Schafer J, Kuhn K, Kienle S, Schwarz J, Schmidt G, et al. Tandem mass tags:  
575 a novel quantification strategy for comparative analysis of complex protein mixtures by  
576 MS/MS. *Anal Chem*. 2003;75(8):1895-904. PMID: 12713048.
- 577 **20.** Mertins P, Udeshi ND, Clauser KR, Mani DR, Patel J, Ong SE, et al. iTRAQ Labeling is  
578 Superior to mTRAQ for Quantitative Global Proteomics and Phosphoproteomics. *Mol Cell*  
579 *Proteomics*. 2012;11(6):M111.014423. PMID: 22210691.
- 580 **21.** Kalesh K, Lukauskas S, Borg AJ, Snijders AP, Ayyappan V, Leung AKL, et al. An Integrated  
581 Chemical Proteomics Approach for Quantitative Profiling of Intracellular ADP-Ribosylation.  
582 *Sci Rep*. 2019;9(1):6655. PMID: 31040352.
- 583 **22.** Cox J, Mann M. MaxQuant enables high peptide identification rates, individualized p.p.b.-  
584 range mass accuracies and proteome-wide protein quantification. *Nat Biotechnol*.  
585 2008;26(12):1367-72. PMID: 19029910.
- 586 **23.** Cox J, Neuhauser N, Michalski A, Scheltema RA, Olsen JV, Mann M. Andromeda: A Peptide  
587 Search Engine Integrated into the MaxQuant Environment. *J Proteome Res*.  
588 2011;10(4):1794-805. PMID: 21254760.
- 589 **24.** Tyanova S, Temu T, Sinitcyn P, Carlson A, Hein MY, Geiger T, et al. The Perseus  
590 computational platform for comprehensive analysis of (prote)omics data. *Nat Methods*.  
591 2016;13(9):731-40. PMID: 27348712.

- 592       **25.** Aslett M, Aurrecochea C, Berriman M, Brestelli J, Brunk BP, Carrington M, et al. TriTrypDB:  
593       a functional genomic resource for the Trypanosomatidae. *Nucleic Acids Res.* 2010;38:D457-  
594       62. PMID: 19843604.
- 595       **26.** Supek F, Bosnjak M, Skunca N, Smuc T. REVIGO Summarizes and Visualizes Long Lists of  
596       Gene Ontology Terms. *PloS One.* 2011;6(7):e21800. PMID: 21789182.
- 597       **27.** Besteiro S, Williams RA, Morrison LS, Coombs GH, Mottram JC. Endosome sorting and  
598       autophagy are essential for differentiation and virulence of *Leishmania major*. *J Biol Chem.*  
599       2006;281(16):11384-96. PMID: 16497676.
- 600       **28.** Green NM. Avidin and Streptavidin. *Method Enzymol.* 1990;184:51-67. PMID: 2388586.
- 601       **29.** Powell S, Forslund K, Szklarczyk D, Trachana K, Roth A, Huerta-Cepas J, et al. eggNOG  
602       v4.0: nested orthology inference across 3686 organisms. *Nucleic Acids Res.*  
603       2014;42(D1):D231-9. PMID: 24297252.
- 604       **30.** Hinz FI, Dieterich DC, Schuman EM. Teaching old NCATs new tricks: using non-canonical  
605       amino acid tagging to study neuronal plasticity. *Curr Opin Chem Biol.* 2013;17(5):738-46.  
606       PMID: 23938204.
- 607       **31.** Lai X, Wang L, Witzmann FA. Issues and applications in label-free quantitative mass  
608       spectrometry. *Int J Proteomics.* 2013;2013:756039. PMID: 23401775.
- 609       **32.** Rauniyar N, Yates JR, 3rd. Isobaric labeling-based relative quantification in shotgun  
610       proteomics. *J Proteome Res.* 2014;13(12):5293-309. PMID: 25337643.
- 611       **33.** Ingolia NT, Ghaemmaghami S, Newman JRS, Weissman JS. Genome-Wide Analysis in Vivo  
612       of Translation with Nucleotide Resolution Using Ribosome Profiling. *Science.*  
613       2009;324(5924):218-23. PMID: 19213877.
- 614       **34.** Bifeld E, Lorenzen S, Bartsch K, Vasquez JJ, Siegel TN, Clos J. Ribosome Profiling Reveals  
615       HSP90 Inhibitor Effects on Stage-Specific Protein Synthesis in *Leishmania donovani*.  
616       *mSystems.* 2018;3(6):e00214-18. PMID: 30505948.
- 617       **35.** Liu TY, Huang HH, Wheeler D, Xu Y, Wells JA, Song YS, et al. Time-Resolved Proteomics  
618       Extends Ribosome Profiling-Based Measurements of Protein Synthesis Dynamics. *Cell Syst.*  
619       2017;4(6):636-44 e9. PMID: 28578850.
- 620       **36.** Brar GA, Weissman JS. Ribosome profiling reveals the what, when, where and how of protein  
621       synthesis. *Nat Rev Mol Cell Biol.* 2015;16(11):651-64. PMID: 26465719.

- 622       **37.** Gerashchenko MV, Gladyshev VN. Translation inhibitors cause abnormalities in ribosome  
623           profiling experiments. *Nucleic Acids Res.* 2014;42(17):e134. PMID: 25056308.
- 624       **38.** Gerashchenko MV, Lobanov AV, Gladyshev VN. Genome-wide ribosome profiling reveals  
625           complex translational regulation in response to oxidative stress. *Proc Natl Acad Sci U S A.*  
626           2012;109(43):17394-9. PMID: 23045643.
- 627       **39.** Baird TD, Wek RC. Eukaryotic Initiation Factor 2 Phosphorylation and Translational Control in  
628           Metabolism. *Adv Nutr.* 2012;3(3):307-21. PMID: 22585904.
- 629       **40.** Cloutier S, Laverdiere M, Chou MN, Boilard N, Chow C, Papadopoulou B. Translational  
630           Control through eIF2alpha Phosphorylation during the Leishmania Differentiation Process.  
631           *PloS One.* 2012;7(5):e35085. PMID: 22693545.
- 632       **41.** de Mendonca SCF, Cysne-Finkelstein L, Matos DCD. Kinetoplastid membrane protein-11 as  
633           a vaccine candidate and a virulence factor in Leishmania. *Front Immunol.* 2015;6:524. PMID:  
634           26528287.
- 635       **42.** Matos DC, Faccioli LA, Cysne-Finkelstein L, Luca PM, Corte-Real S, Armoa GR, et al.  
636           Kinetoplastid membrane protein-11 is present in promastigotes and amastigotes of  
637           Leishmania amazonensis and its surface expression increases during metacyclogenesis.  
638           *Mem Inst Oswaldo Cruz.* 2010;105(3):341-7. PMID: 20512252.
- 639       **43.** Sinha S, Kumar A, Sundaram S. A comprehensive analysis of LACK (Leishmania homologue  
640           of receptors for activated C kinase) in the context of Visceral Leishmaniasis. *Bioinformation.*  
641           2013;9(16):832-7. PMID: 24143055.
- 642       **44.** Iyer JP, Kaprakkaden A, Choudhary ML, Shaha C. Crucial role of cytosolic trypanothione  
643           peroxidase in Leishmania donovani survival, drug response and virulence. *Mol Microbiol.*  
644           2008;68(2):372-91. PMID: 18312262.
- 645       **45.** Suman SS, Equbal A, Zaidi A, Ansari MY, Singh KP, Singh K, et al. Up-regulation of cytosolic  
646           trypanothione peroxidase in Amp B resistant isolates of Leishmania donovani and its interaction with  
647           cytosolic trypanothione peroxidase. *Biochimie.* 2016;121:312-25. PMID: 26743980.
- 648       **46.** Andrade JM, Murta SM. Functional analysis of cytosolic trypanothione peroxidase in antimony-  
649           resistant and -susceptible Leishmania braziliensis and Leishmania infantum lines. *Parasit*  
650           *Vectors.* 2014;7:406. PMID: 25174795.

- 651       **47.** Zhang WW, McCall LI, Matlashewski G. Role of cytosolic glyceraldehyde-3-phosphate  
652           dehydrogenase in visceral organ infection by *Leishmania donovani*. *Eukaryot Cell*.  
653           2013;12(1):70-7. PMID: 23125352.
- 654       **48.** Lynch M, Marinov GK. The bioenergetic costs of a gene. *Proc Natl Acad Sci U S A*.  
655           2015;112(51):15690-5. PMID: 26575626.
- 656       **49.** Legrain P, Wojcik J, Gauthier JM. Protein--protein interaction maps: a lead towards cellular  
657           functions. *Trends Genet*. 2001;17(6):346-52. PMID: 11377797.
- 658       **50.** Feldman HJ. Identifying structural domains of proteins using clustering. *BMC Bioinformatics*.  
659           2012;13:286. PMID: 23116496.
- 660       **51.** Waterhouse A, Bertoni M, Bienert S, Studer G, Tauriello G, Gumienny R, et al. SWISS-  
661           MODEL: homology modelling of protein structures and complexes. *Nucleic Acids Res*.  
662           2018;46(W1):W296-303. PMID: 29788355.

## 663   **Supporting Information**

664   **S1 Fig. Chemical structure of the capture reagents used.** (A) 5-TAMRA-Alkyne used for  
665   click chemistry followed by in-gel fluorescence imaging. (B) Acetylene-PEG4-Biotin used for  
666   click chemistry followed by affinity enrichment and iTRAQ proteomics MS.

667   (TIFF)

668   **S2 Fig. Gene Ontology word cloud of the NSPs identified in *L. mexicana***  
669   **promastigotes during starvation.** (A) Biological Process GO term enrichment word cloud  
670   (B) Cellular Component GO term enrichment word cloud, and (C) Molecular Function GO  
671   term enrichment word cloud.

672   (TIFF)

673   **S1 Table. LC-MS/MS protein identification and quantification output.** The complete list  
674   of proteins identified in two replicate iTRAQ 4-plex labelling experiments along with the  
675   corrected reported intensities of the four iTRAQ channels for each protein in the two  
676   experiments following MaxQuant-Perseus database search and data processing. The  
677   corrected reporter intensities of each iTRAQ channel is presented as a fold change (FC) in

678 log2 scale from the DMSO control 114 channel. The symbol NaN indicates a non-valid value  
679 resulting from missing reporter ion signals. T-test significant ( $p \leq 0.05$ ) entries are indicated  
680 with a + sign and only those proteins that are both significant and with 2 or more identified  
681 unique peptides were used for subsequent bioinformatic analysis.

682 (XLSX)

683 **S2 Table. Top-50 NSPs identified at 1 hour starvation.** The proteins are listed in the  
684 descending order of their observed FC in abundance values in log2 scale.

685 (PDF)

686 **S3 Table. Top-50 NSPs identified at 2 hour starvation.** The proteins are listed in the  
687 descending order of their observed FC in abundance values in log2 scale.

688 (PDF)

689 **S4 Table. Top-50 NSPs identified at 3 hour starvation.** The proteins are listed in the  
690 descending order of their observed FC in abundance values in log2 scale.

691 (PDF)

692

(A)

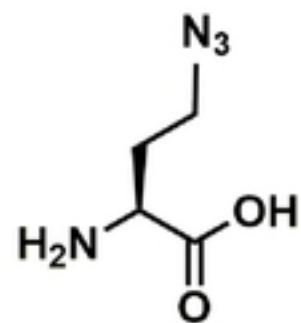

L-Azidohomoalanine (AHA)

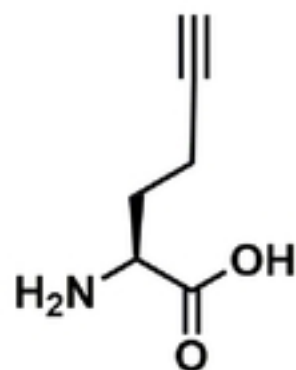

L-Homopropargylglycine (HPG)

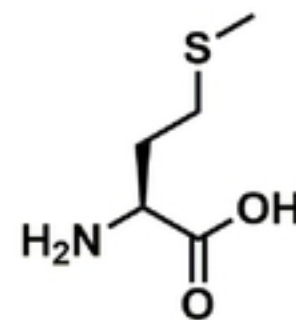

L-Methionine

(B)

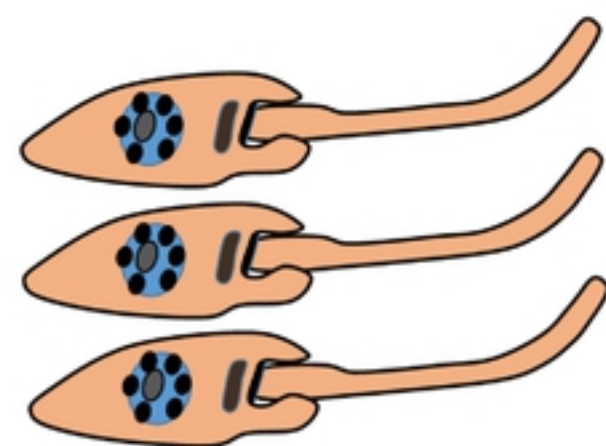*Leishmania mexicana*  
promastigotes

AHA  
Lysis

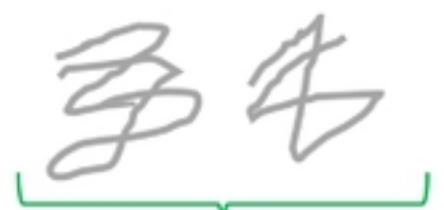

Old proteome

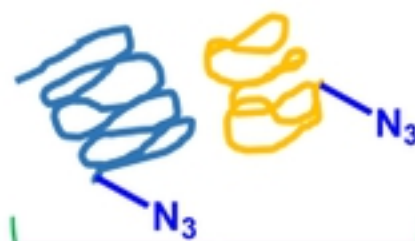Newly synthesised  
proteome(AHA labelled)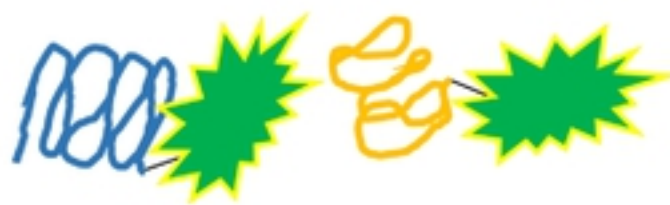

Fluorescent tagged NSPs

Click chemistry

Fluorescent alkyne

(C)

M. wt. ladder  
100µM AHA  
1mM AHA  
1mM AHA +  
10µM CHX

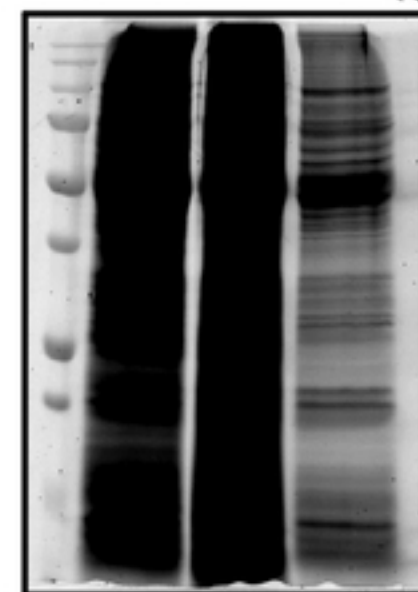

Fluorescence

Figure 1



**M. wt. ladder**  
**DMSO control**  
**No starvation + AHA**  
**1 h starvation + AHA**  
**2 h starvation + AHA**  
**3 h starvation + AHA**  
**4 h starvation + AHA**  
**7 h starvation + AHA**  
**No starvation + AHA + CHX**

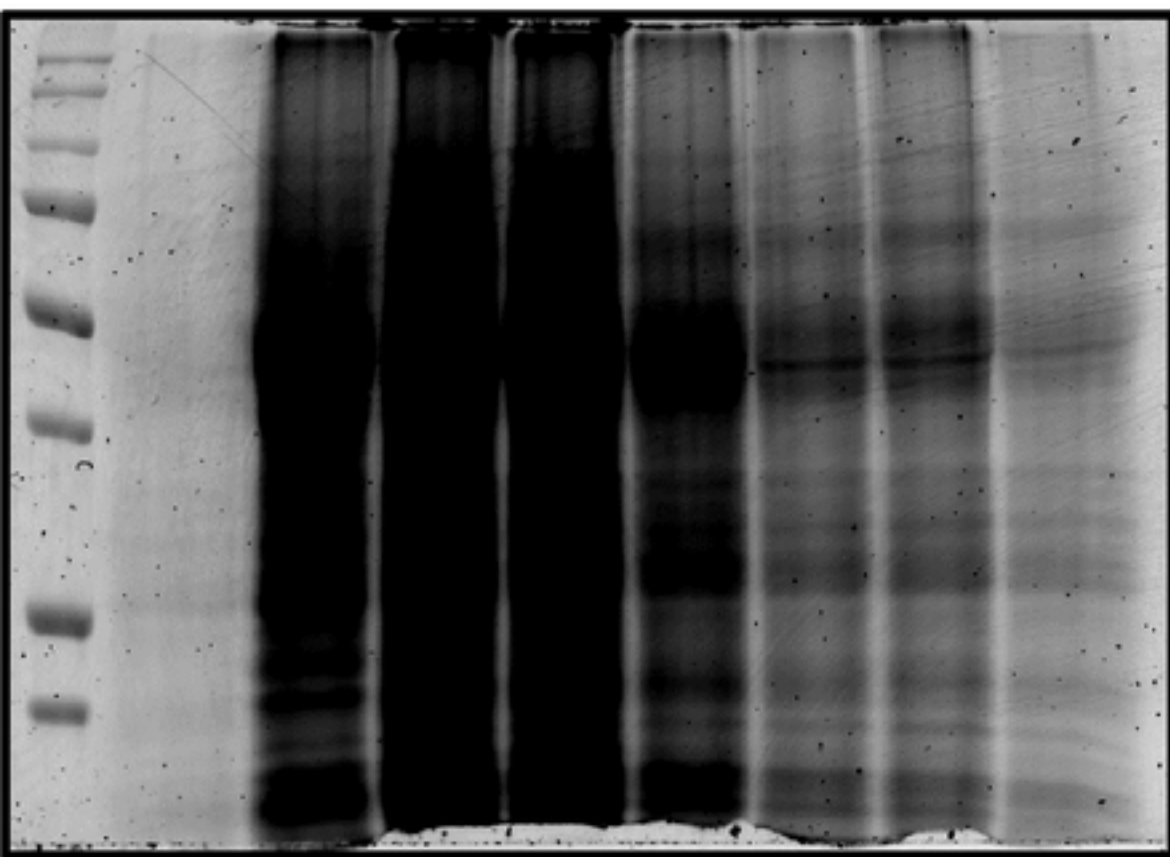

Fluorescence

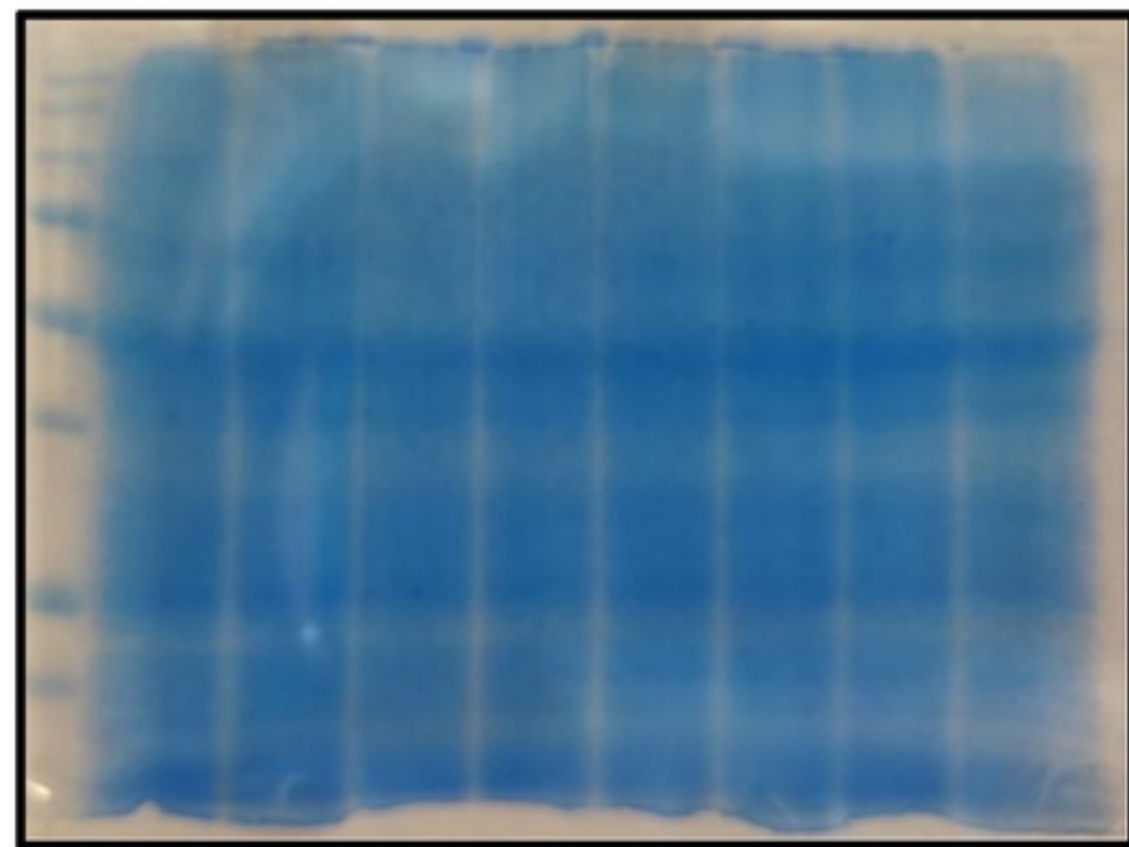

Coomassie blue

Figure 2

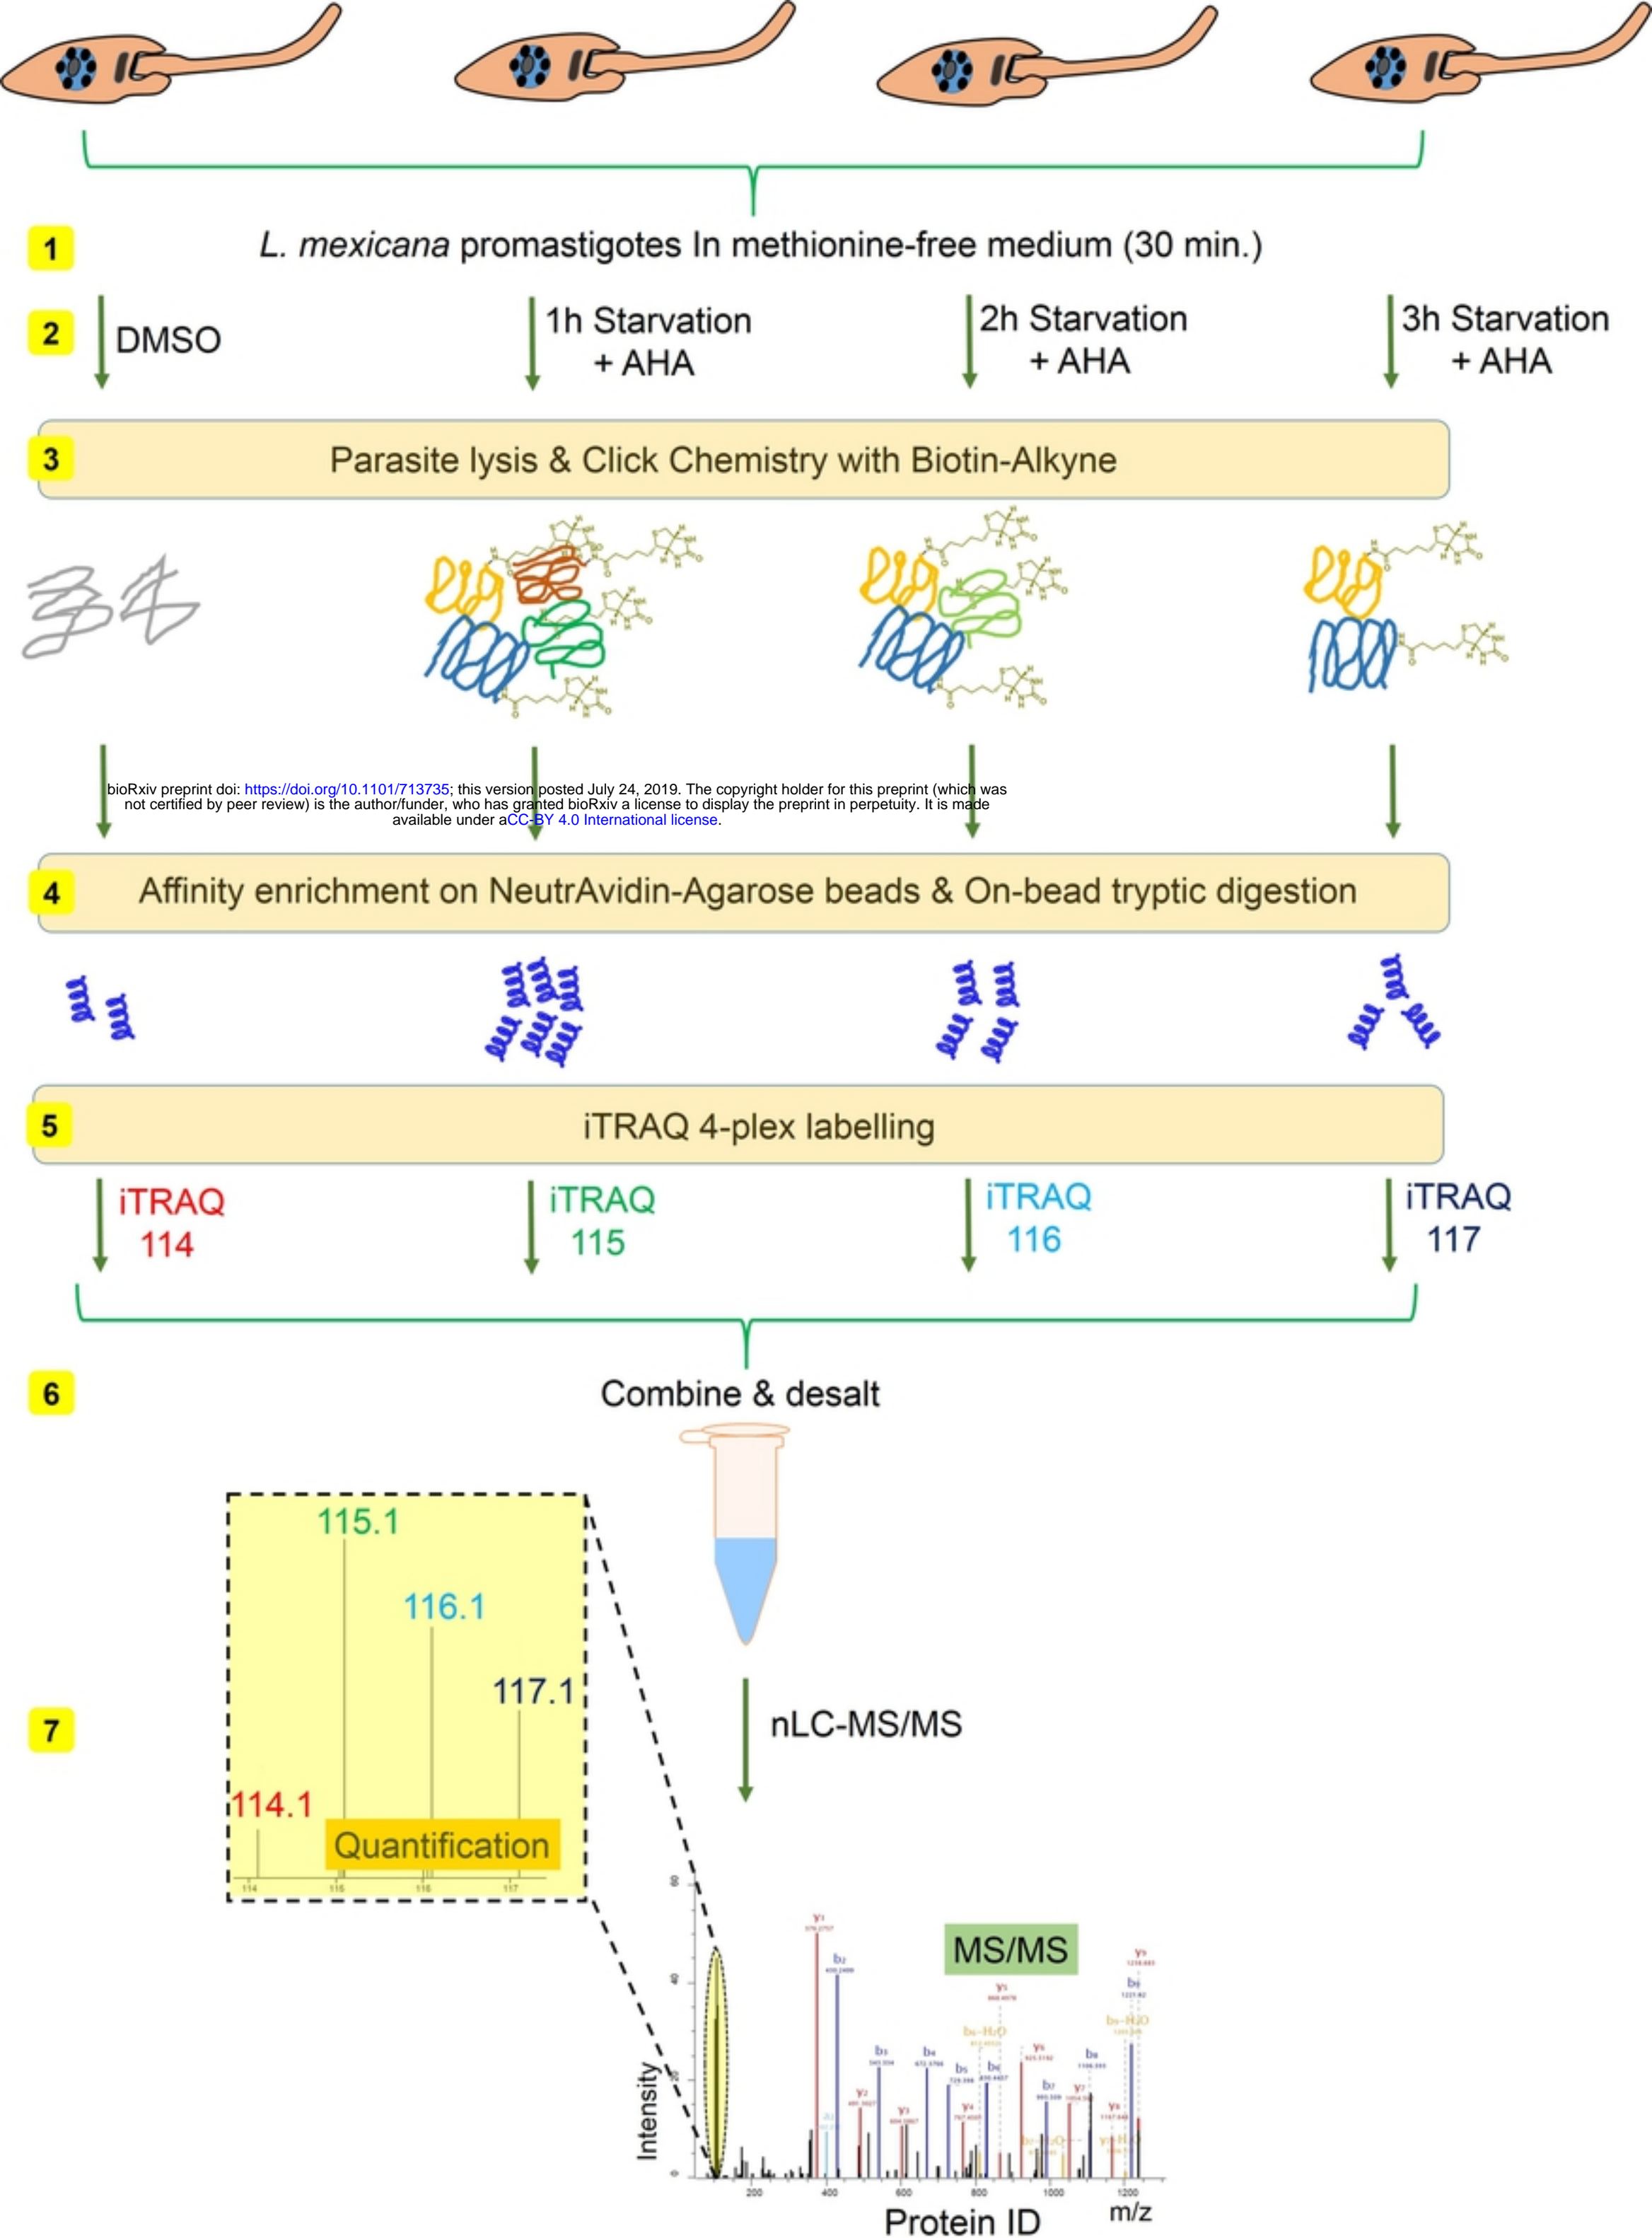

Figure 3



(A)

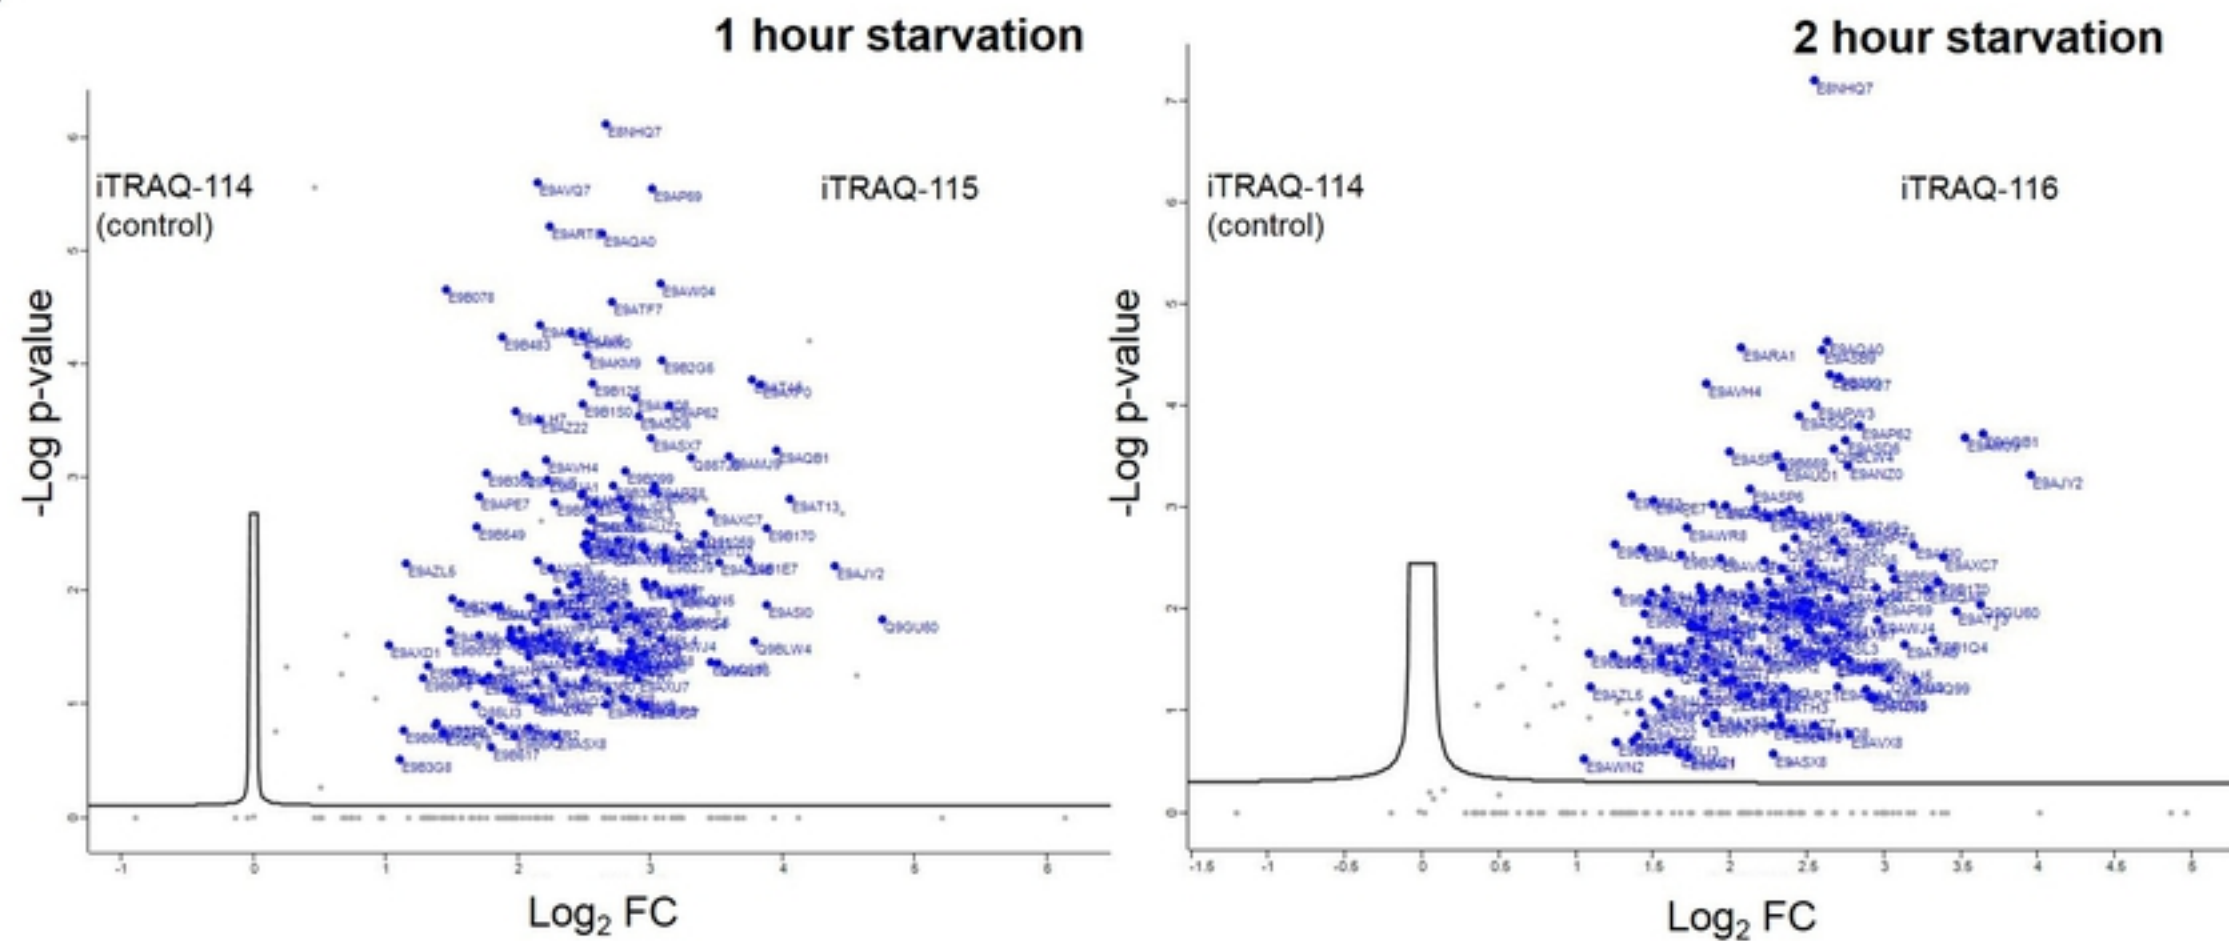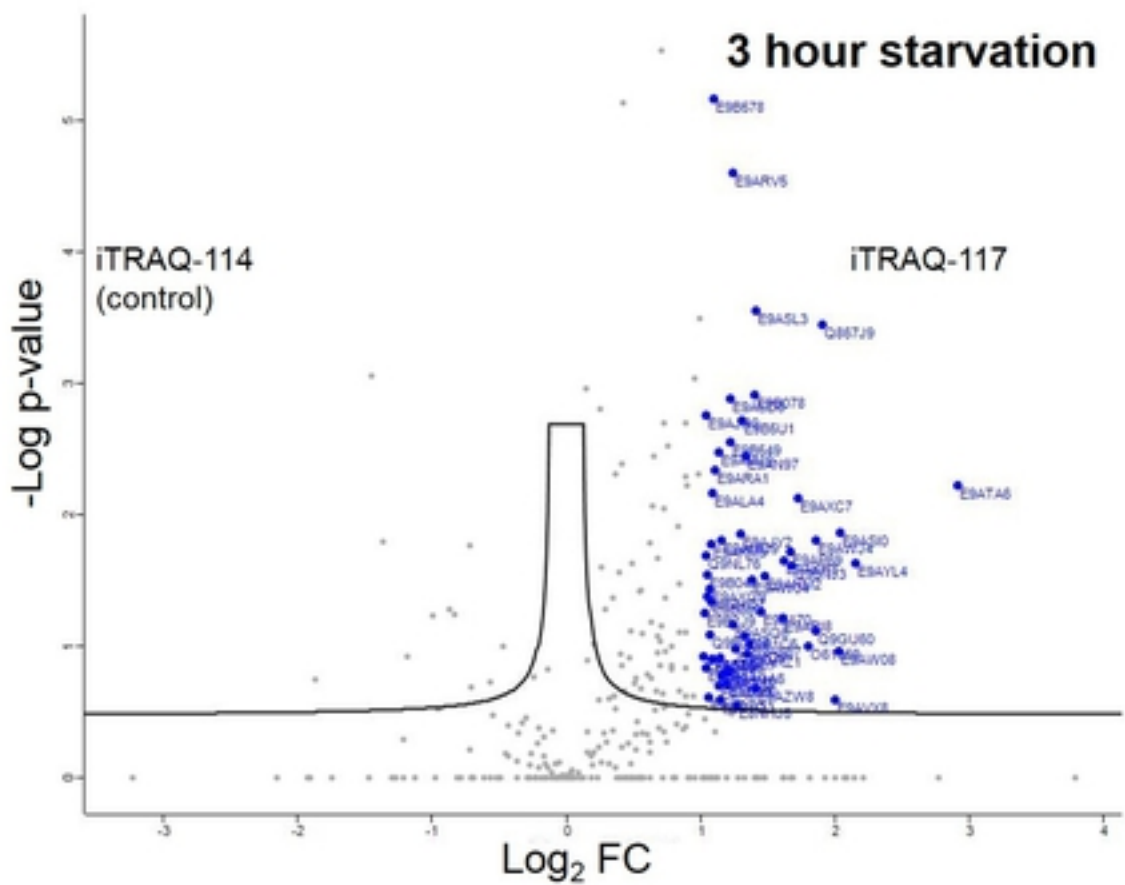

(B)

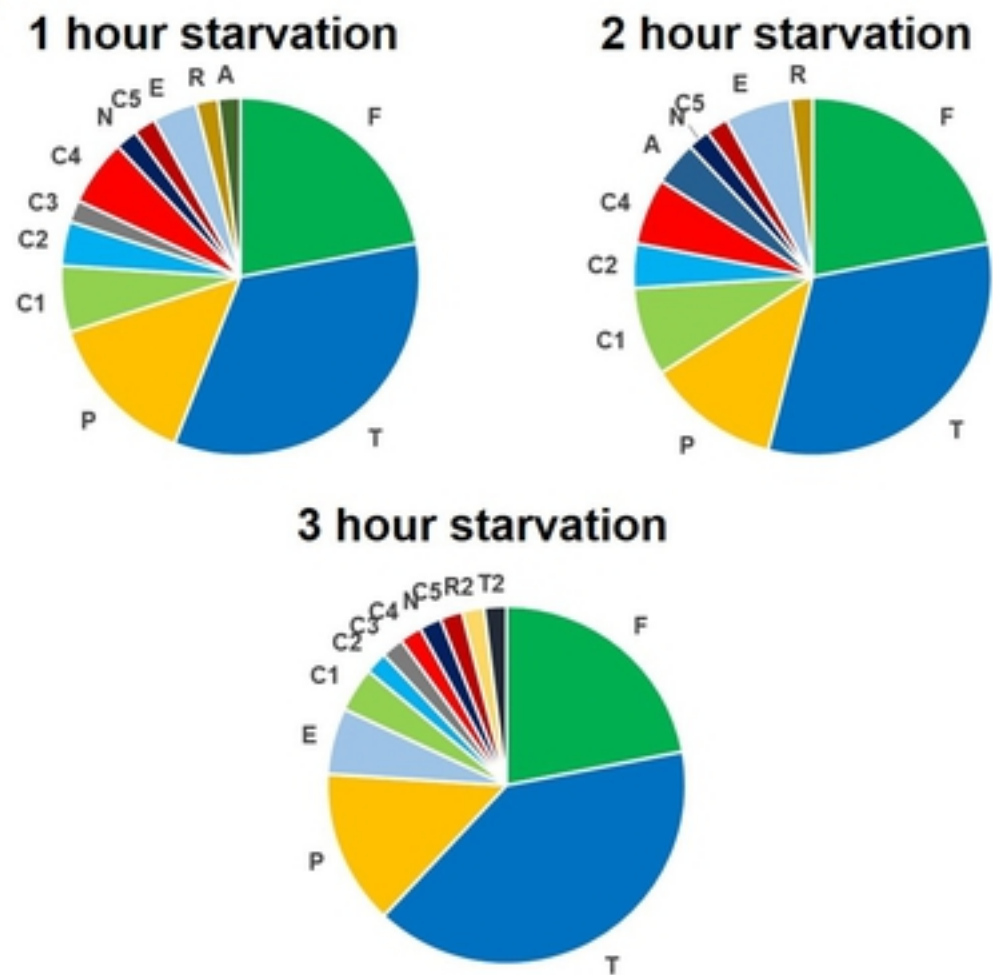

Figure 4

(A)

GO Term: Biological Process

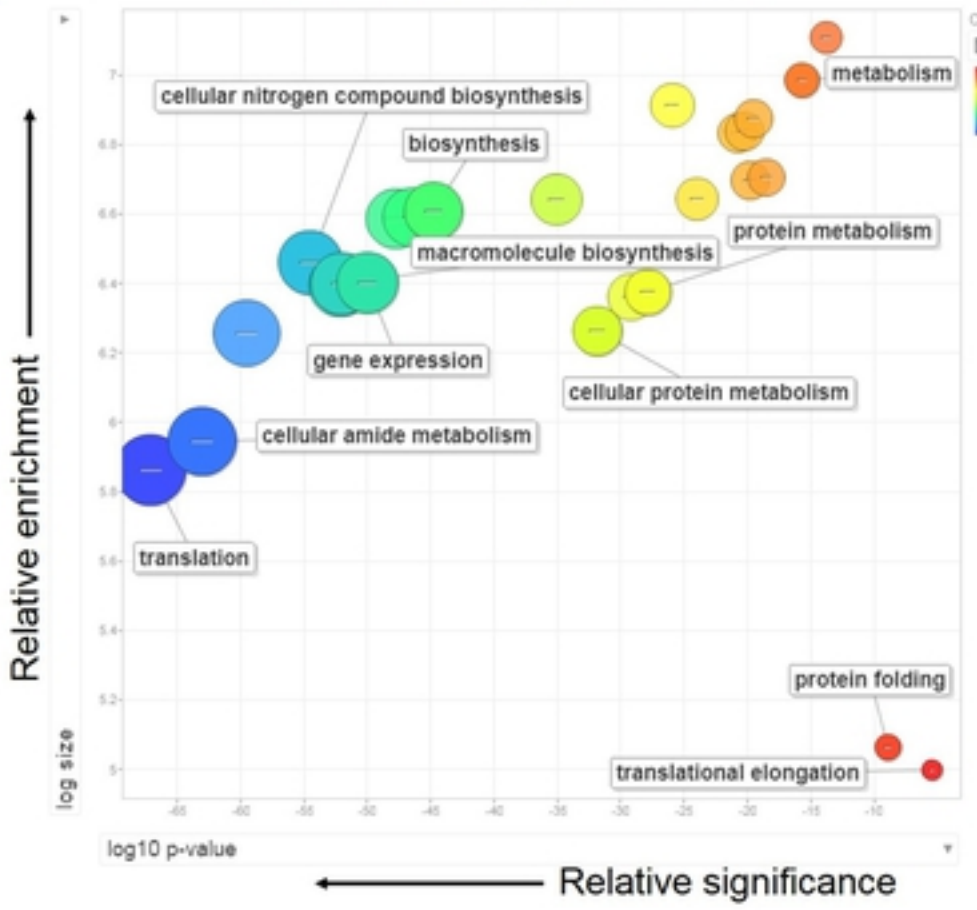

(B)

GO Term: Cellular Component

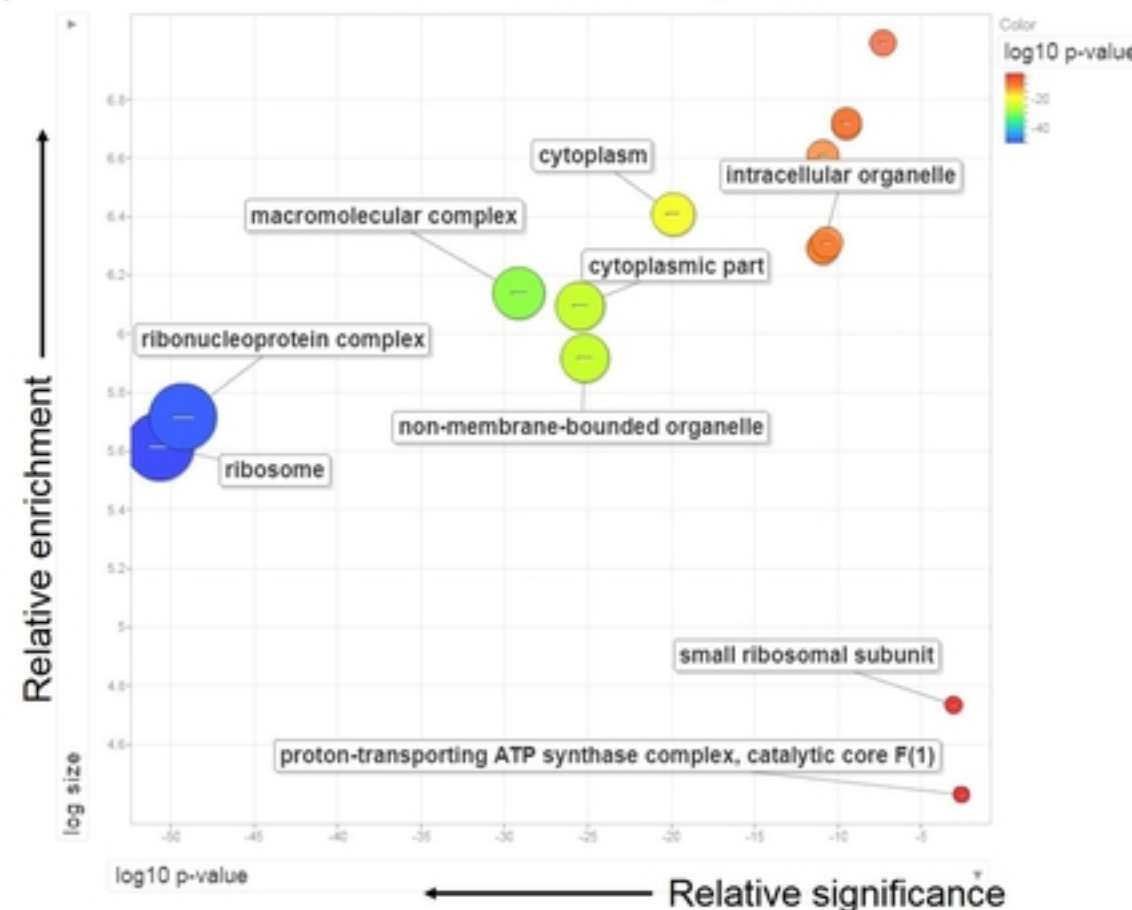

(C)

GO Term: Molecular Function

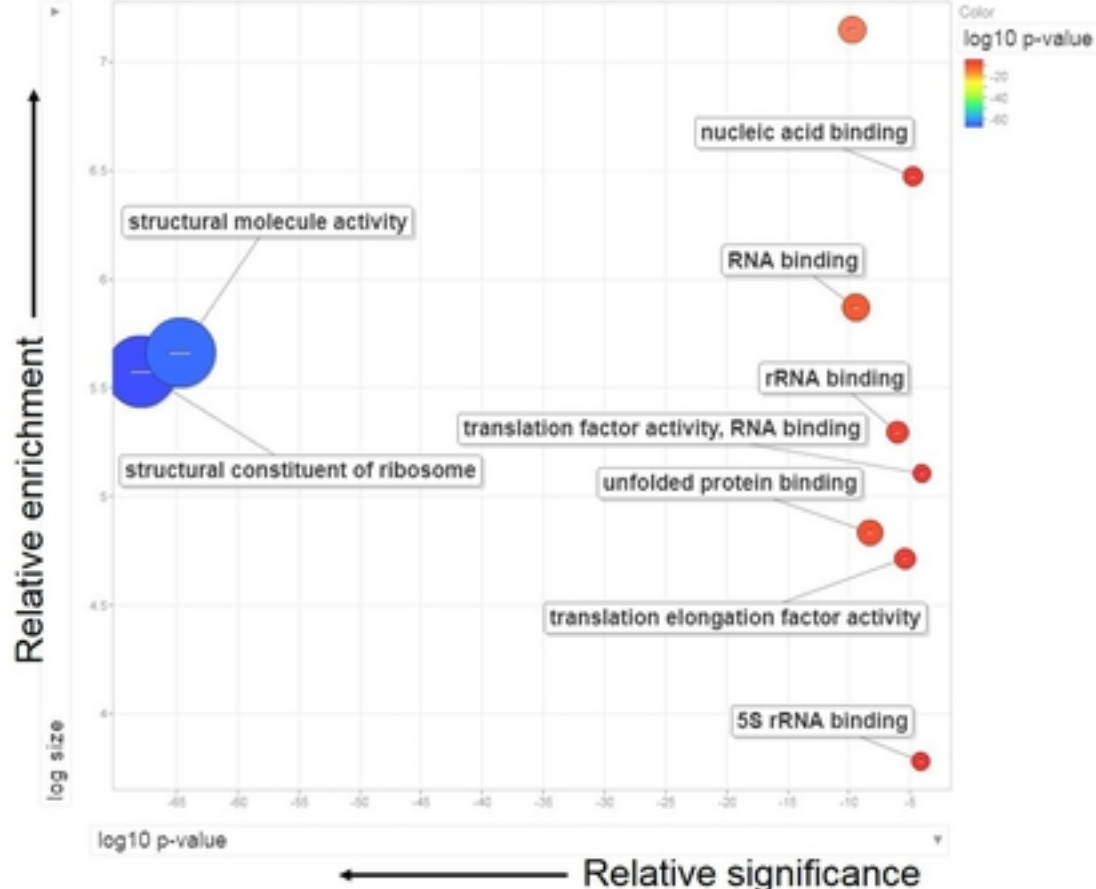

Figure 5
